# Supplementary material
Source: PubMed Central journal article supplement (PMC3148940)
Supplement: NIHMS236202-supplement-1.pdf [file NIHMS236202-supplement-1.pdf]

## Supplemental Discussion

Our estimate for  $T_1$  is based on the assumption that no passenger mutations were present prior to tumor initiation, as pancreatic ductal epithelium is not a proliferative tissue type and divides only rarely<sup>1 2</sup>. We further validated this assumption by evaluating whether mutations found in Pa08 were present in the matched precursor pancreatic intraepithelial neoplasia or acinar-ductal metaplastic lesions present within the pancreas of this same patient. Apart from the *KRAS* mutation, none of the other mutations in the infiltrating carcinoma or metastasis were identified in these precursor lesions, implying that all passenger mutations had accumulated after tumor initiation.

Previously, Meza et al.<sup>3</sup> reported the average sojourn time of premalignant pancreatic lesions to be 50-60 years based on the analysis of pancreatic cancer incidence data, which is significantly longer than the times we are reporting. We believe that the difference between the times that we report and those from Meza et al. is due to the fact that our times are based on data from patients that developed detectable pancreatic cancers, whereas Meza et al. reported average sojourn times for all premalignant pancreatic lesions, including those that never become malignant during an individual's lifetime.

We note that in estimating times  $T_1$  and  $T_2$  we made the assumption that the average cell doubling times are roughly the same in the two stages (tumor initiation to parental clone and parental clone to metastasis). We believe that the value we assigned to the average cell doubling time during the second stage (parental clone to metastasis) is accurate, as this has been measured in pancreatic cancers rather than in early stage

tumors. The actual cell doubling time during the first stage (tumor initiation to parental clone) may be somewhat longer than the value we assumed. The actual cell doubling time may also be somewhat longer than our estimate if extinct lineages have shorter cell cycle times. However, a larger value would make an even stronger case for the long window of opportunity for early detection of pancreatic cancer that we identified, and therefore our conclusion on this point is conservative. It is also possible that the rate of cell division is different in different patients, depending on genomic instability, treatment and other factors. For this reason we note that the averages for  $T_1$ ,  $T_2$  and  $T_3$  are more reliable than the corresponding times we report for individual patients.

#### REFERENCES

- <sup>1</sup> W. M. Klein, R. H. Hruban, A. J. Klein-Szanto et al., Direct Correlation between Proliferative Activity and Dysplasia in Pancreatic Intraepithelial Neoplasia (Panin): Additional Evidence for a Recently Proposed Model of Progression, *Mod Pathol* **15** (4), 441 (2002).
- <sup>2</sup> T. Terada, T. Ohta, Y. Kitamura et al., Cell Proliferative Activity in Intraductal Papillary-Mucinous Neoplasms and Invasive Ductal Adenocarcinomas of the Pancreas: An Immunohistochemical Study, *Archives of Pathology & Laboratory Medicine* **122** (1), 42 (1998).
- <sup>3</sup> R. Meza, J. Jeon, S. H. Moolgavkar et al., Age-Specific Incidence of Cancer: Phases, Transitions, and Biological Implications, *Proceedings of the National Academy of Sciences of the United States of America* **105** (42), 16284 (2008).

## **Supplementary Figure Legends**

**Supplementary Fig. 1. Schematic of methodology and analysis of data in the current study.**

**Supplementary Fig. 2. Representative sequencing chromatograms of somatic mutations in Pa04 and Pa08.** a. *ADAM11* mutations were present in the primary carcinoma and all metastasis samples, indicating it arose prior to the development of metastasis. DNA from a normal tissue of the same patient (representing the germ-line) was negative. b. Mutations in *CTNND2* were present in one of the metastasis samples only (lung).

### **Supplementary Figs 3-8. Proposed clonal evolution based on the sequencing data.**

Somatic mutations identified in all samples (primary and metastases) from each patient are listed within the parental clone (indicated by an orange circle). Genes listed in green are acquired mutations (progressors) and genes listed in red were lost in the clones giving rise to specific metastases, indicated by their lower case alphabetical identifier. The index lesion for each patient is also indicated. Grey circles represent theoretical clones, and dashed arrows represent theoretical relationships between clones.

**Supplementary Fig. 3. Proposed clonal evolution of Pa01.**

**Supplementary Fig. 4. Proposed clonal evolution of Pa03.**

**Supplementary Fig. 5. Proposed clonal evolution of Pa02.**

**Supplementary Fig. 6. Proposed clonal evolution of Pa07.**

**Supplementary Fig. 7. Proposed clonal evolution of Pa05.**

**Supplementary Fig. 8. Proposed clonal evolution of Pa04.**

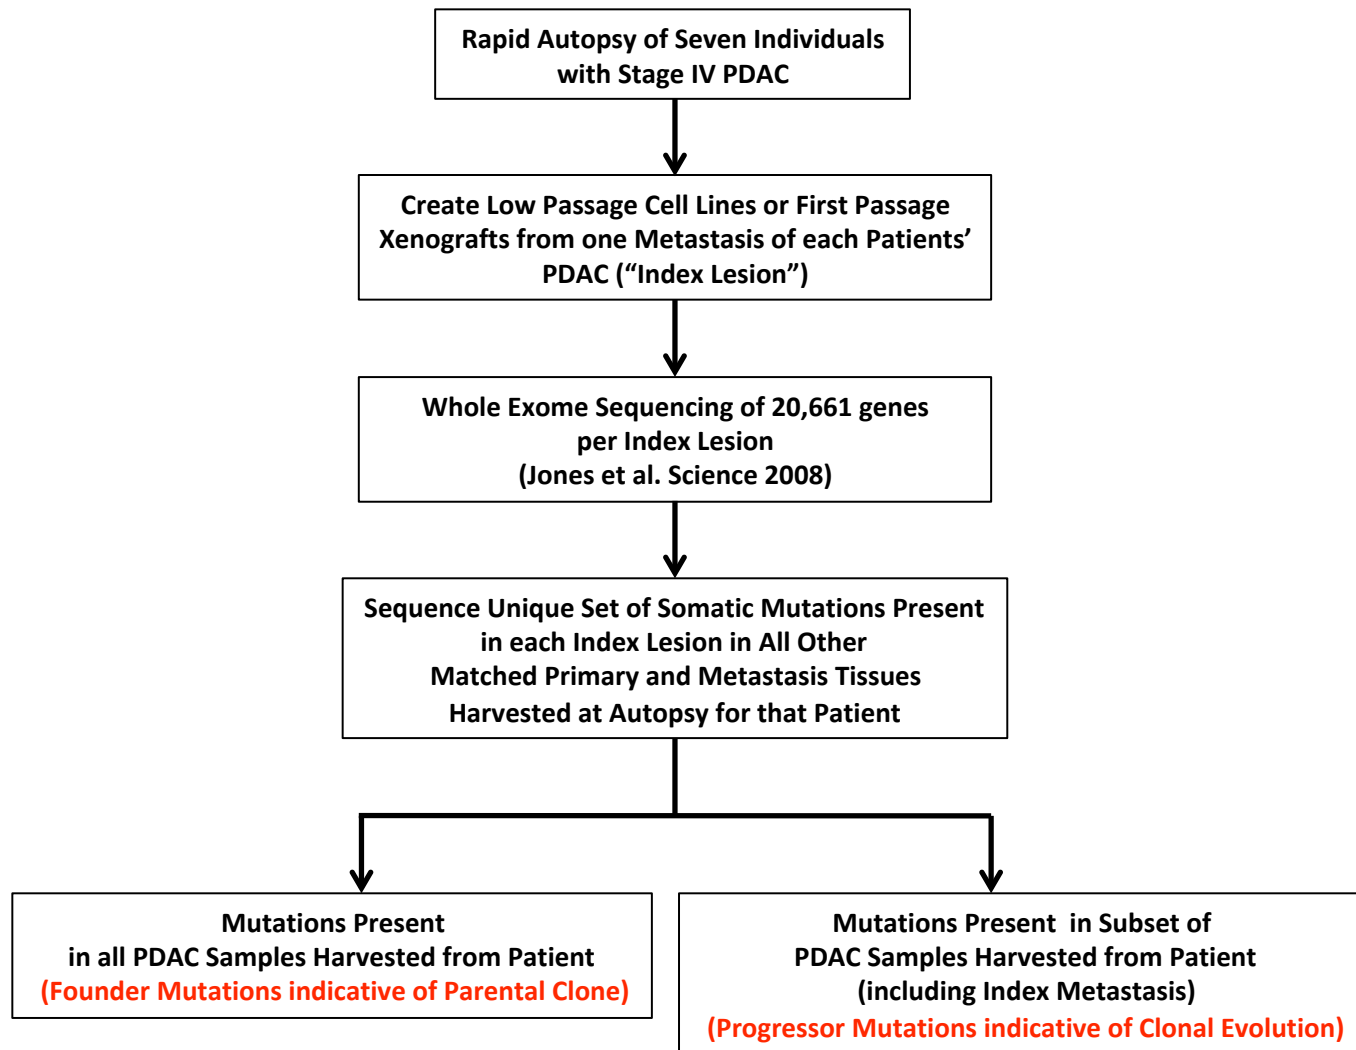

Supplementary Fig 1

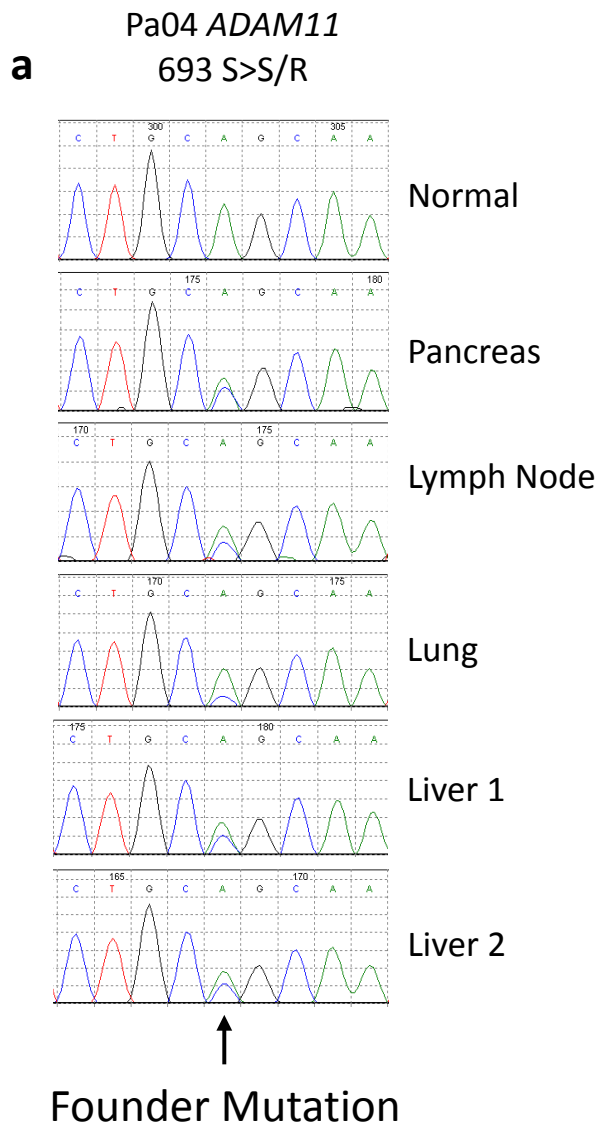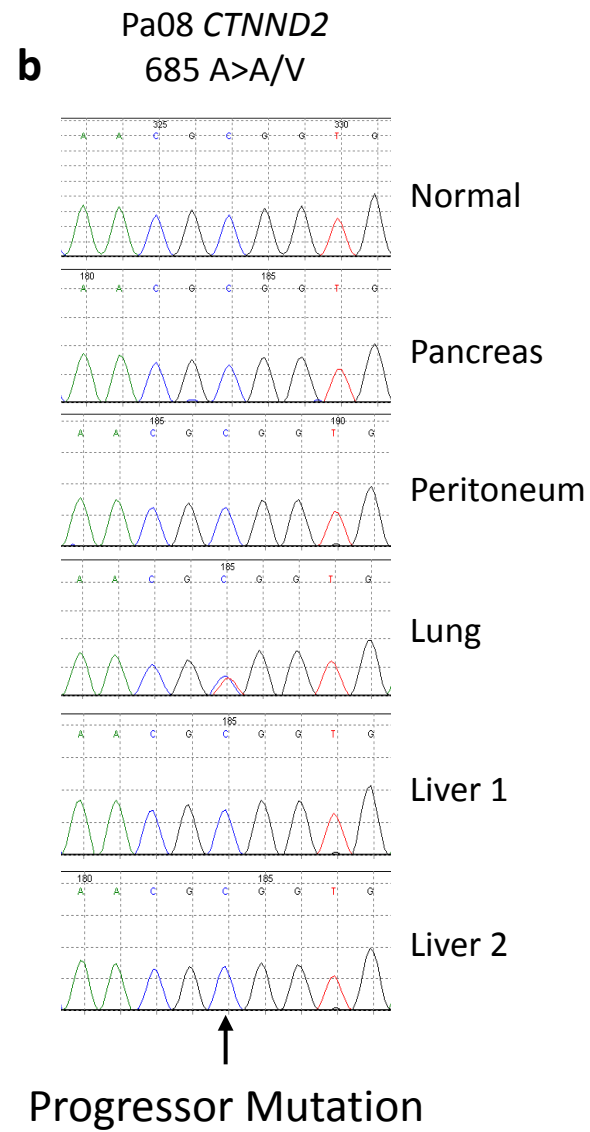

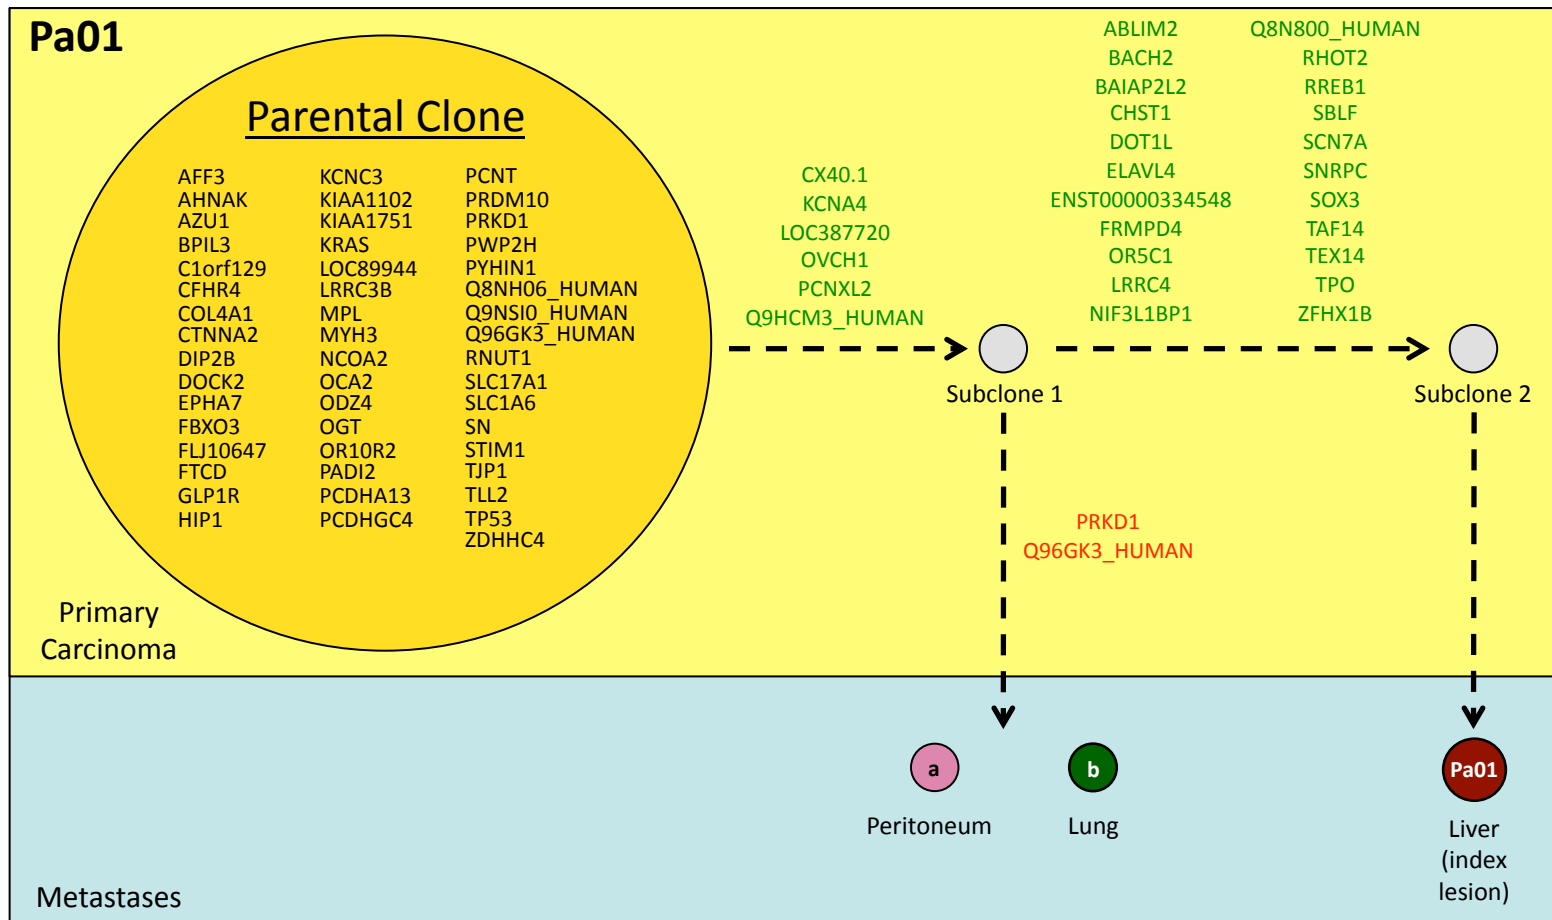

Supplementary Fig 3

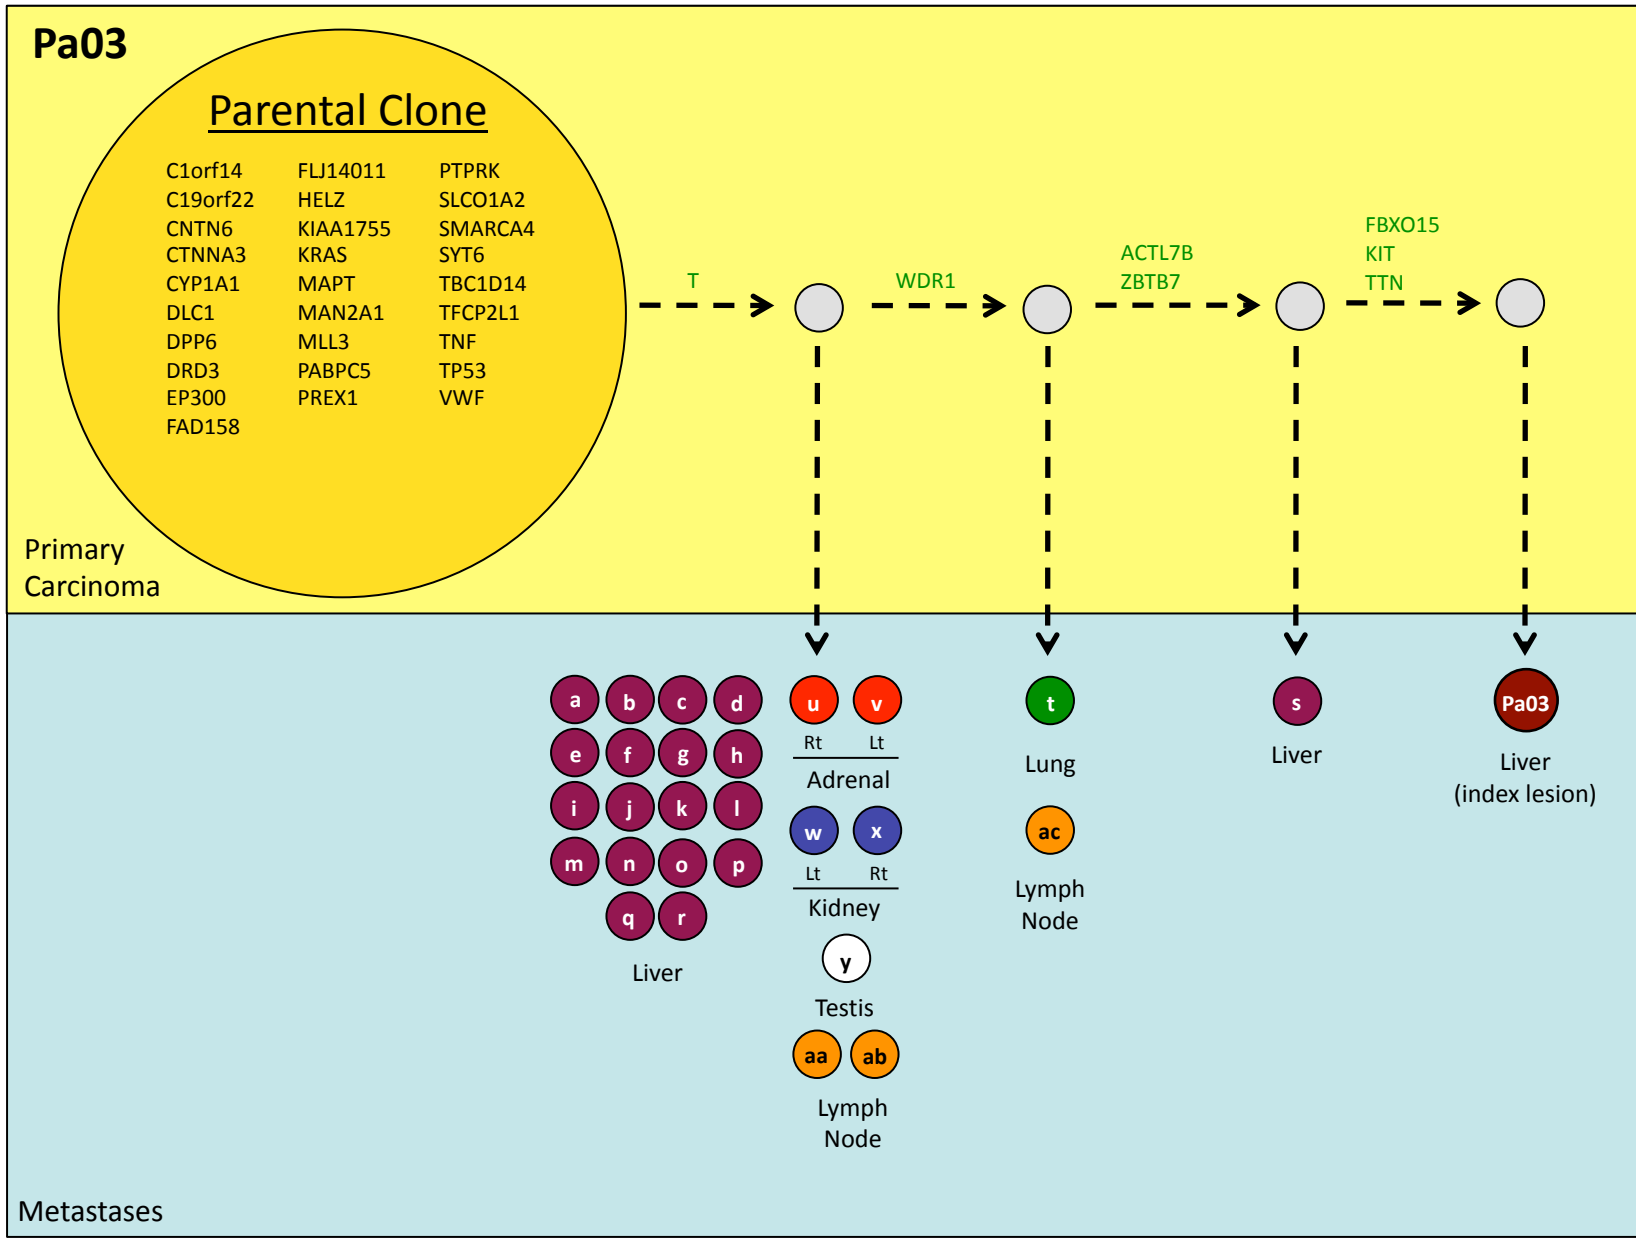

Supplementary Fig 4



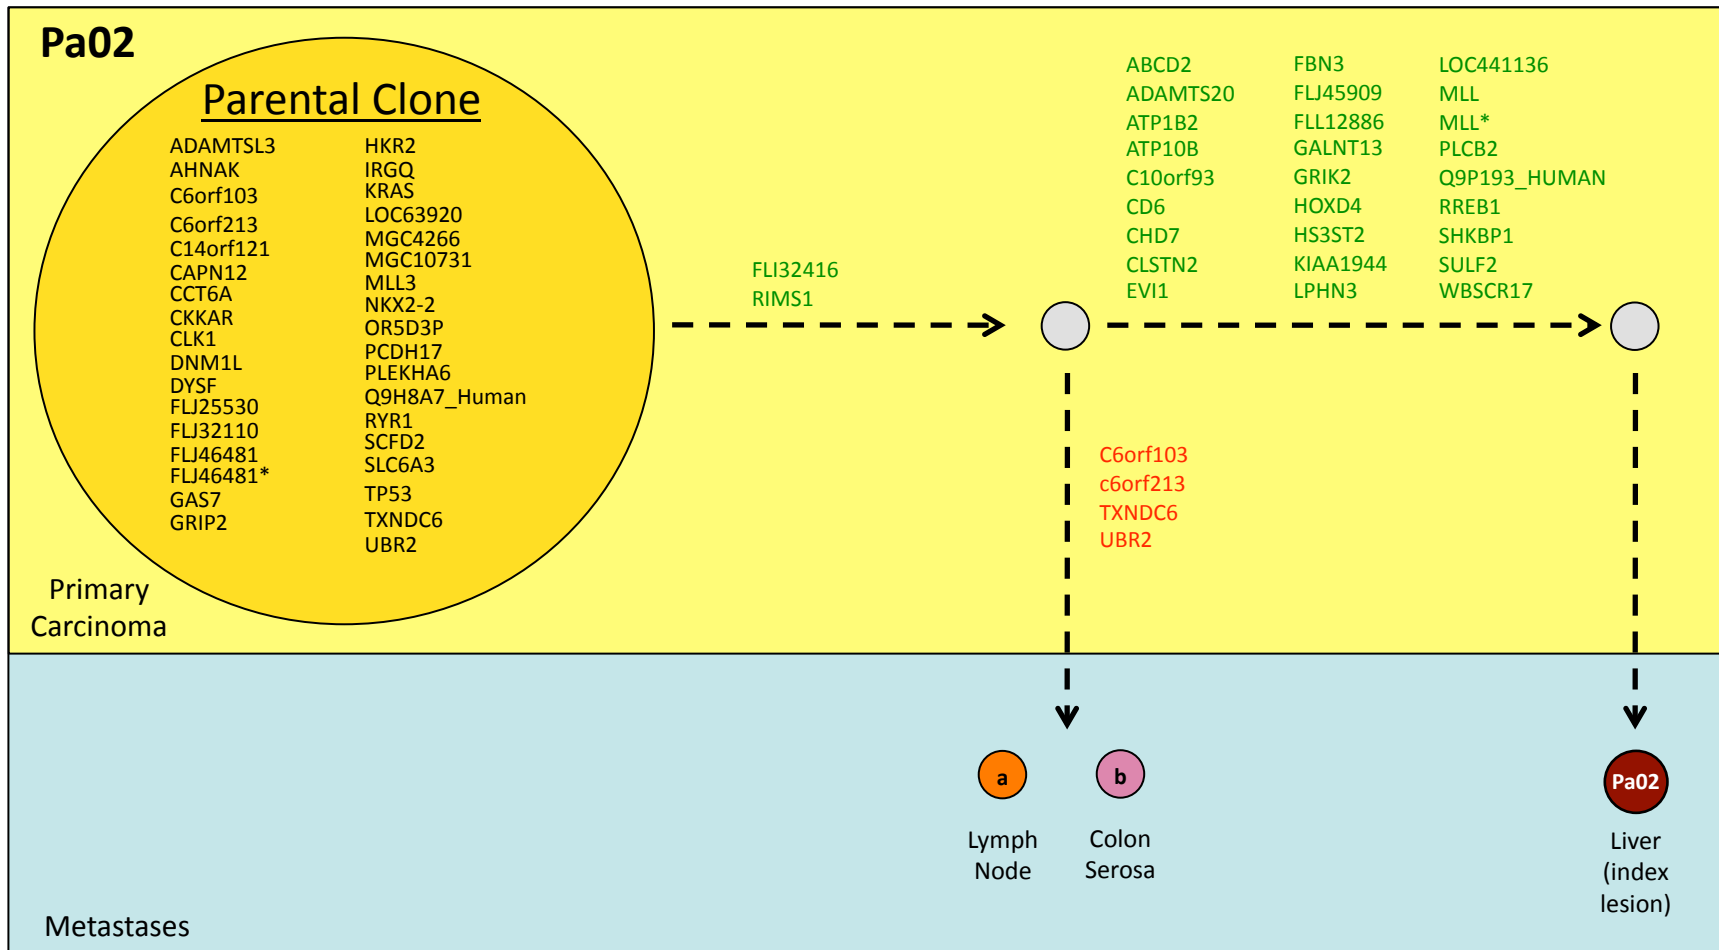

Supplementary Fig 5

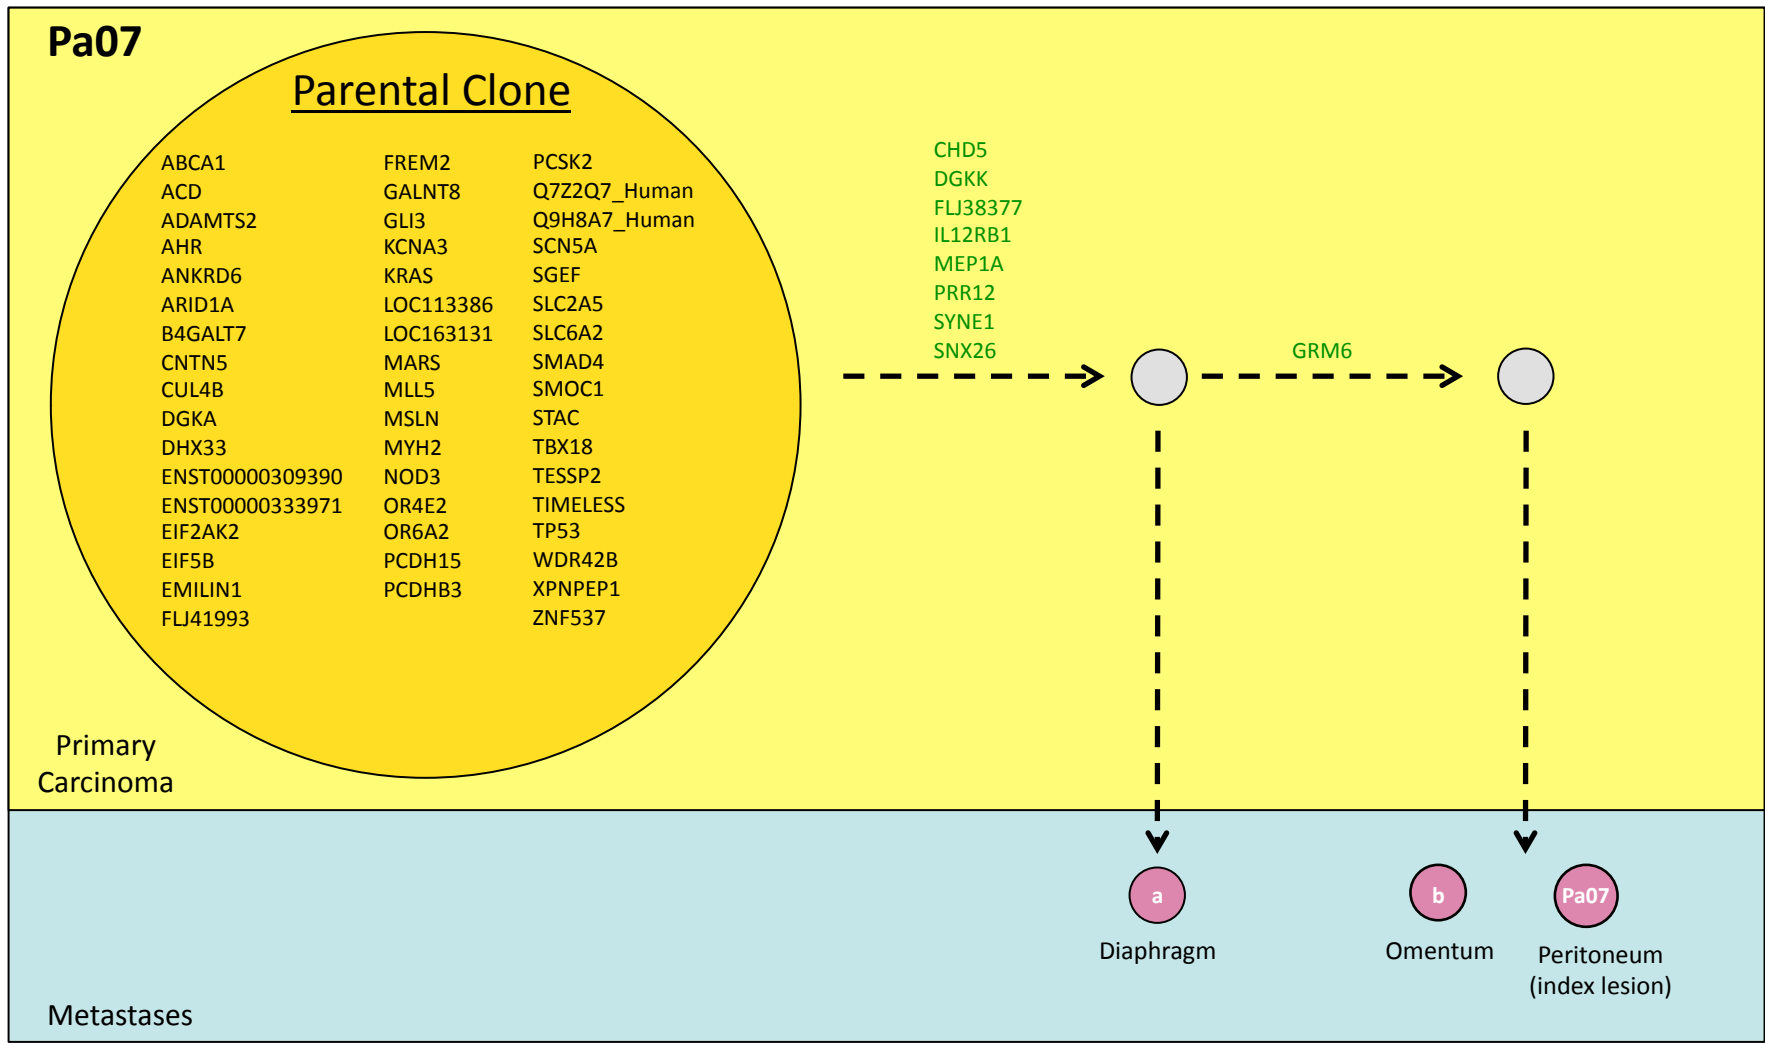

Supplementary Fig 6

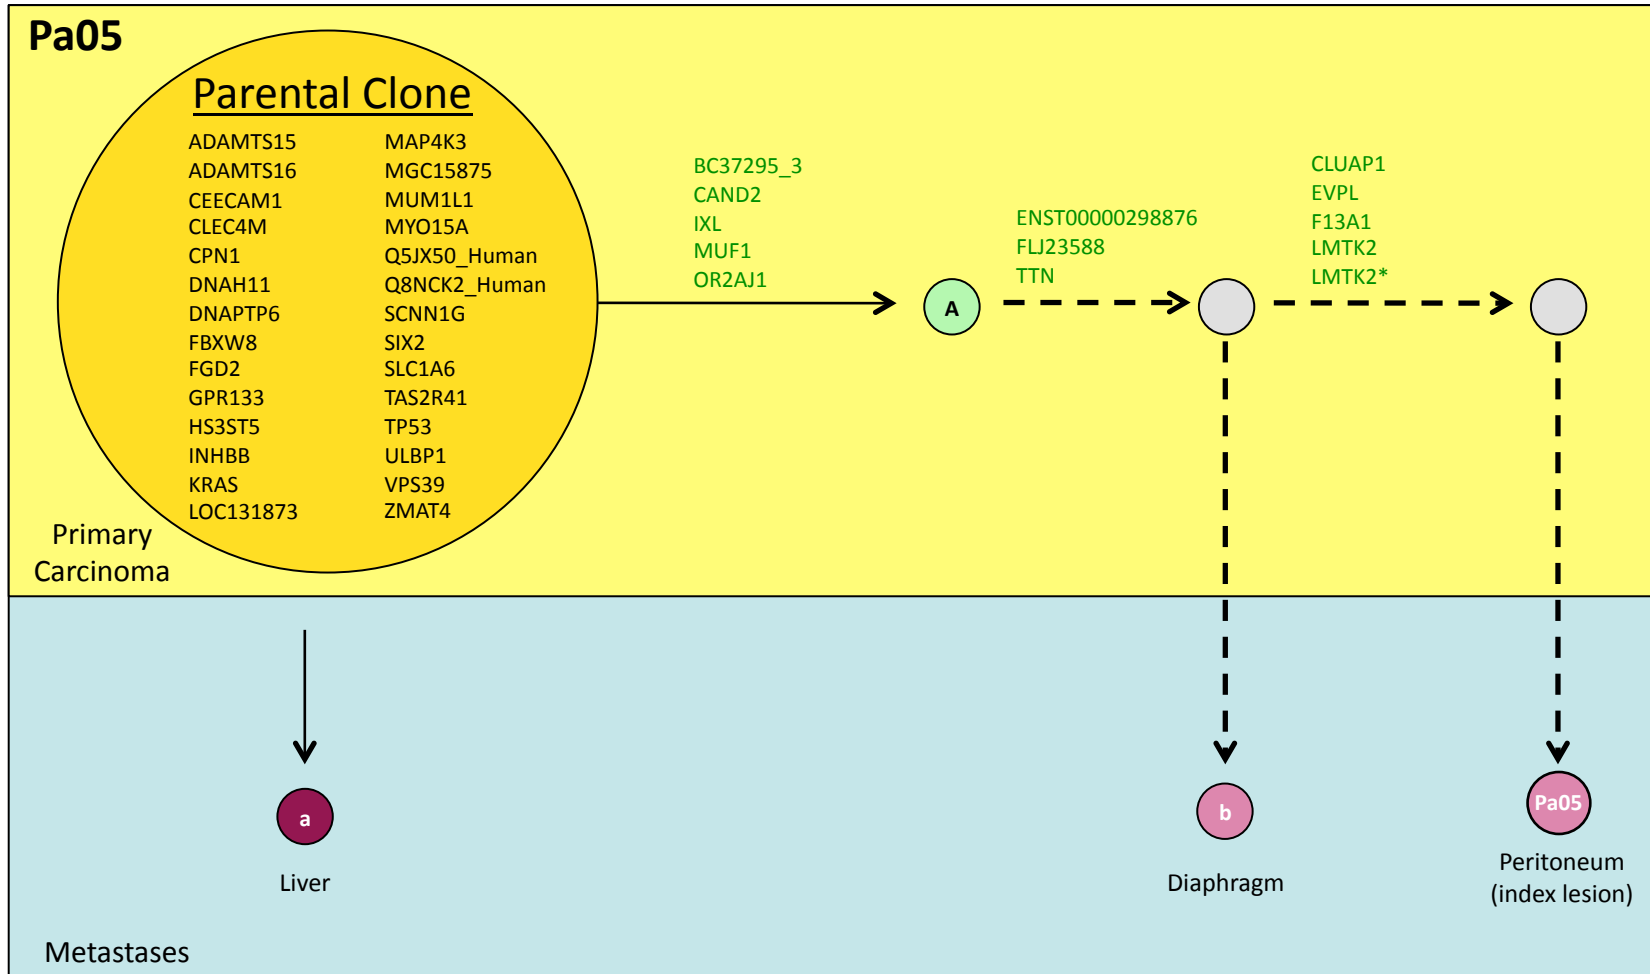

Supplemental Fig 7

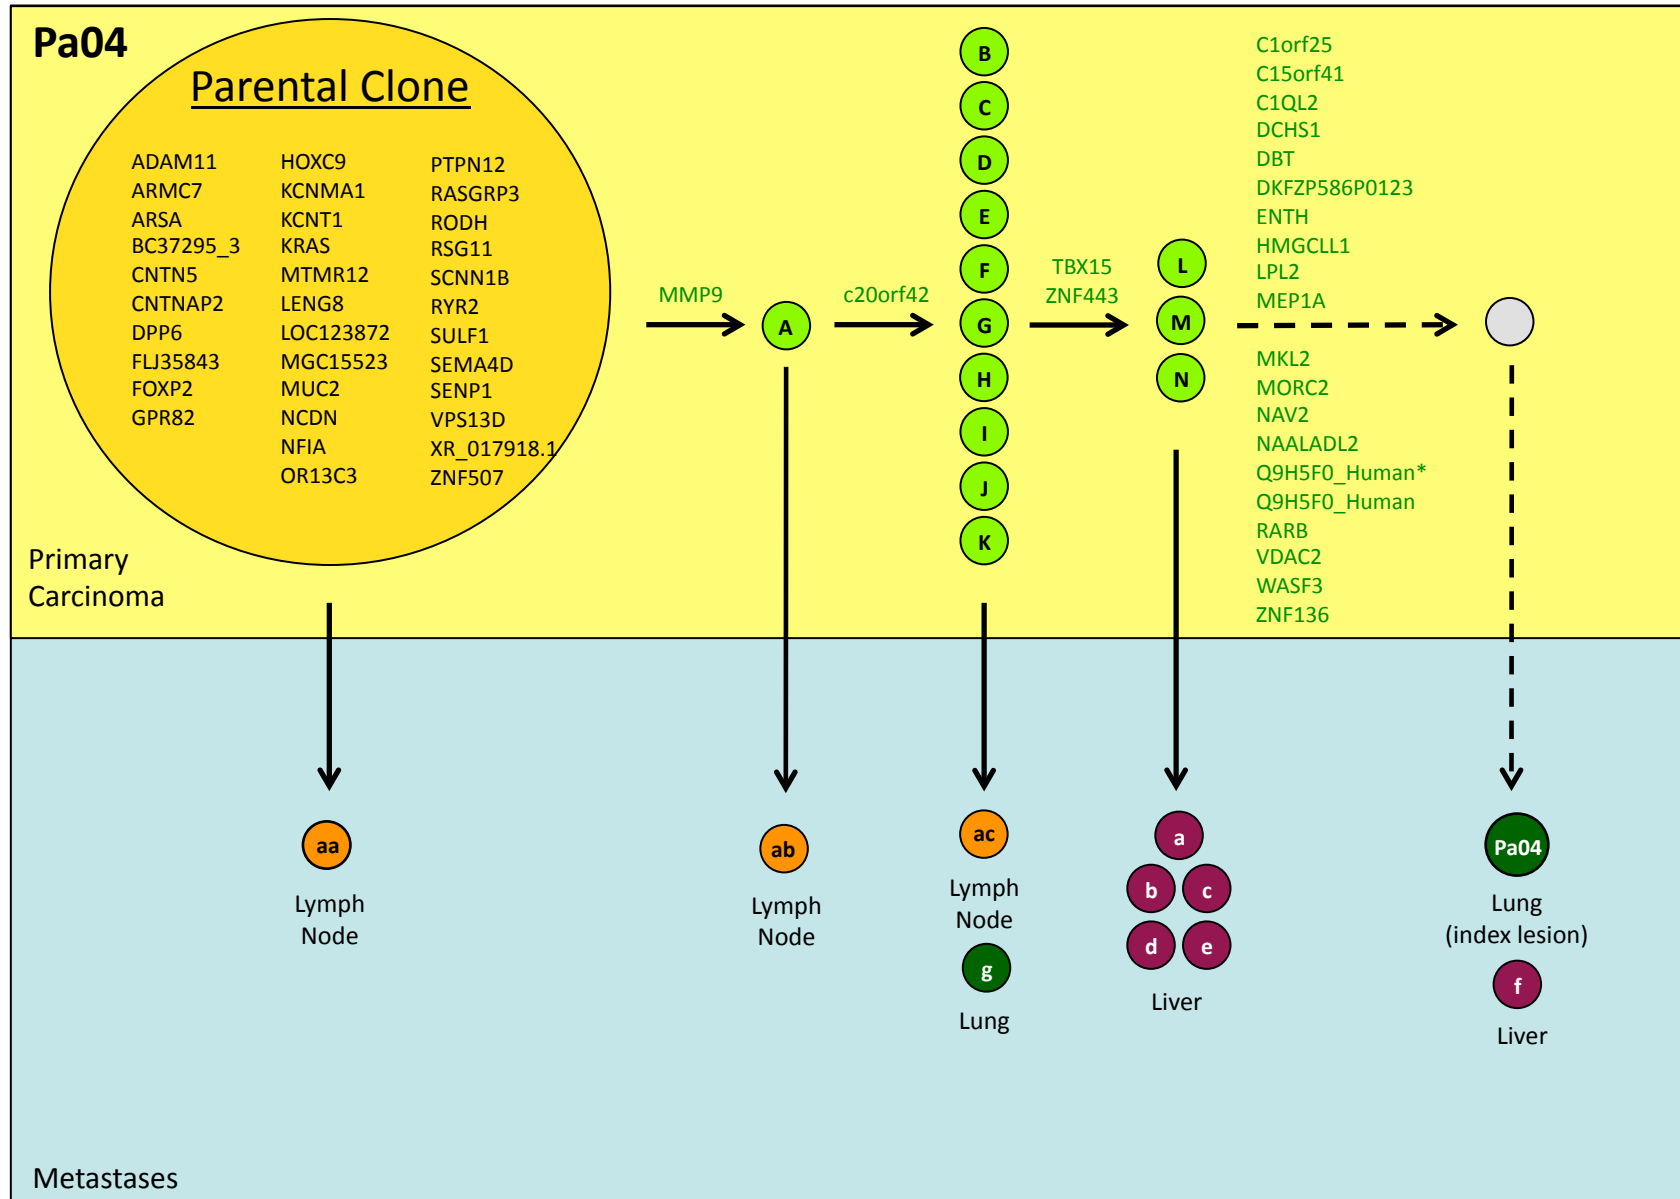

Supplementary Fig 8

**Supplementary Table 1.** Clinical features of Seven Patients with Metastatic Pancreatic Ductal Adenocarcinoma

| Patient no | Jones <i>et al.</i> <sup>7</sup> ID no. | Age/<br>Sex | TNM stage (UICC) at diagnosis | Therapy |                    |                                                           | Survival from diagnosis | Sites of Disease at Autopsy        | Site of Index lesion |
|------------|-----------------------------------------|-------------|-------------------------------|---------|--------------------|-----------------------------------------------------------|-------------------------|------------------------------------|----------------------|
|            |                                         |             |                               | Surgery | Adjuvant treatment | Treatment for advanced or recurrent disease               |                         |                                    |                      |
| A2         | Pa01                                    | 62/M        | cTxNxM1 (Stage IV)            | No      |                    | Taxoprexin (4 cycles)→PD→Gemcitabine (1 cycle)            | 6 mo                    | Liver, Lung, Peritoneum            | Liver                |
| A6         | Pa02                                    | 57/M        | cT3NxM1 (Stage IV)            | No      |                    | Gemcitabine (4 cycles)→PD→Troxacitabine (1 cycle)         | 8 mo                    | Liver, Lymph Node, Peritoneum      | Liver                |
| A10        | Pa03                                    | 60/M        | cT4NxM1 (Stage IV)            | No      |                    |                                                           | 1 mo                    | Liver, Lung, Lymph Node, and Other | Liver                |
| A13        | Pa04                                    | 59/M        | cTxNxM1 (Stage IV)            | No      |                    |                                                           | 7mo                     | Liver, Lung, Lymph Node            | Lung                 |
| A44        | Pa05                                    | 50/M        | pT3N1M0 (Stage IIB)           | Yes     | 5-FU/XRT           | Vaccine/Cyclophosphamide/Cetuximab                        | 10 mo                   | Liver, Peritoneum                  | Peritoneum           |
| A32        | Pa07                                    | 81/M        | cT4NxM0 (Stage III)           | No      |                    | 5-FU (2 cycles)/XRT                                       | 3 mo                    | Lung, Lymph Node, Peritoneum       | Peritoneum           |
| A38        | Pa08                                    | 51/M        | cTxNxM1 (Stage IV)            | No      |                    | Gemcitabine/Bevacizumab (9 cycles)→PD→Rapamycin (1 cycle) | 15 mo                   | Liver, Lung, Peritoneum            | Lung                 |

5-FU, 5-fluorouracil; XRT, radiotherapy; PD, progression of disease.

**Supplementary Table 2.** Somatic mutations identified in 7 Stage IV pancreatic cancers by whole exome sequencing<sup>a</sup>.

| Gene            | Transcript Accession ID | Tumor | Nucleotide (genomic) <sup>*</sup> | Nucleotide (cDNA) <sup>*†</sup> | Amino acid (protein) <sup>**‡</sup> | Mutation Type | Mutated in Stage IV Index Lesions Only | Candidate Cancer Gene <sup>a</sup> |
|-----------------|-------------------------|-------|-----------------------------------|---------------------------------|-------------------------------------|---------------|----------------------------------------|------------------------------------|
| ABLIM2          | NM_032432               | Pa01C | g.chr4:8173987A>T                 | c.821A>T                        | p.K274M                             | Missense      |                                        |                                    |
| AFF3            | NM_001025108            | Pa01C | g.chr2:99668708G>A                | c.2008G>A                       | p.V670M                             | Missense      |                                        |                                    |
| AHNAK           | NM_024060               | Pa01C | g.chr11:62059122G>A               | c.271G>A                        | p.D91N                              | Missense      |                                        |                                    |
| AZU1            | CCDS12044.1             | Pa01C | g.chr19:781714C>T                 | c.367C>T                        | p.R123C                             | Missense      |                                        |                                    |
| BACH2           | CCDS5026.1              | Pa01C | g.chr6:90716990C>T                | c.1556C>T                       | p.T519I                             | Missense      |                                        |                                    |
| BAIAP2L2        | NM_025045               | Pa01C | g.chr22:36818680C>T               | c.355C>T                        | p.R119C                             | Missense      |                                        |                                    |
| BPIL3           | CCDS13211.1             | Pa01C | g.chr20:31084455C>G               | c.102C>G                        | p.V34V                              | Synonymous    |                                        |                                    |
| C1orf129        | NM_025063               | Pa01C | g.chr1:167690800C>T               | c.1026C>T                       | p.D342D                             | Synonymous    |                                        |                                    |
| CFHR4           | NM_006684               | Pa01C | g.chr1:193603315G>A               | c.169G>A                        | p.D57N                              | Missense      |                                        |                                    |
| CHST1           | CCDS7913.1              | Pa01C | g.chr11:45628689C>T               | c.361C>T                        | p.R121C                             | Missense      |                                        |                                    |
| COL4A1          | CCDS9511.1              | Pa01C | g.chr13:109623068G>T              | c.3556G>T                       | p.G1186C                            | Missense      |                                        |                                    |
| CTNNA2          | NM_004389               | Pa01C | g.chr2:80008655G>A                | c.524G>A                        | p.R175H                             | Missense      |                                        |                                    |
| CX40.1          | CCDS7191.1              | Pa01C | g.chr10:35937467G>A               | c.1020G>A                       | p.A340A                             | Synonymous    |                                        |                                    |
| DIP2B           | NM_173602               | Pa01C | g.chr12:49407842G>A (homozygous)  | c.3490G>A                       | p.G1164S                            | Missense      |                                        |                                    |
| DOCK2           | CCDS4371.1              | Pa01C | g.chr5:169059679G>T               | c.1216G>T                       | p.V406L                             | Missense      | Y                                      |                                    |
| DOT1L           | NM_032482               | Pa01C | g.chr19:2161814C>T                | c.1311C>T                       | p.H437H                             | Synonymous    |                                        |                                    |
| ELAVL4          | CCDS553.1               | Pa01C | g.chr1:50373404C>G                | c.660C>G                        | p.A220A                             | Synonymous    |                                        |                                    |
| ENST00000334548 | ENST00000334548         | Pa01C | g.chr3:132029537G>T               | c.335G>T                        | p.C112F                             | Missense      |                                        |                                    |
| EPHA7           | CCDS5031.1              | Pa01C | g.chr6:94177446G>T                | c.326G>T                        | p.C109F                             | Missense      |                                        |                                    |
| FBXO3           | CCDS7887.1              | Pa01C | g.chr11:33734042G>A               | c.529G>A                        | p.V177I                             | Missense      |                                        |                                    |
| FLJ10647        | CCDS406.1               | Pa01C | g.chr1:36457669C>A                | c.63C>A                         | p.I21I                              | Synonymous    |                                        |                                    |
| FRMPD4          | NM_014728               | Pa01C | g.chrX:12495340C>A                | c.2738C>A                       | p.S913Y                             | Missense      |                                        |                                    |
| FTCD            | CCDS13731.1             | Pa01C | g.chr21:46382957C>T               | c.1336C>T                       | p.R446W                             | Missense      |                                        |                                    |
| GLP1R           | CCDS4839.1              | Pa01C | g.chr6:39154880C>T                | c.969C>T                        | p.I323I                             | Synonymous    |                                        |                                    |

|              |                 |       |                                  |            |             |             |   |   |
|--------------|-----------------|-------|----------------------------------|------------|-------------|-------------|---|---|
| HIP1         | NM_005338       | Pa01C | g.chr7:74816871C>T               | c.2840C>T  | p.A947V     | Missense    |   |   |
| KCNA4        | NM_002233       | Pa01C | g.chr11:29989035C>G              | c.1767C>G  | p.L589L     | Synonymous  |   |   |
| KCNC3        | CCDS12793.1     | Pa01C | g.chr19:55515339C>T              | c.2250C>T  | p.N750N     | Synonymous  |   |   |
| KIAA1102     | NM_014988       | Pa01C | g.chr4:41462176G>T               | c.726G>T   | p.L242L     | Synonymous  |   |   |
| KIAA1751     | ENST00000270720 | Pa01C | g.chr1:1928626G>A                | c.1448G>A  | p.G480R     | Missense    |   |   |
| KRAS         | CCDS8702.1      | Pa01C | g.chr12:25289551G>A              | c.35G>A    | p.G12D      | Missense    |   | Y |
| LOC387720    | NM_001013633    | Pa01C | g.chr10:129424833G>A             | c.127G>A   | p.G43R      | Missense    |   |   |
| LOC89944     | NM_138342       | Pa01C | g.chr11:133720188C>T             | c.404C>T   | p.P135L     | Missense    |   |   |
| LRRC3B       | CCDS2644.1      | Pa01C | g.chr3:26726196G>A (homozygous)  | c.29G>A    | p.R10H      | Missense    |   |   |
| LRRC4        | CCDS5799.1      | Pa01C | g.chr7:127263383T>A              | c.1262T>A  | p.V421E     | Missense    |   |   |
| MPL          | CCDS483.1       | Pa01C | g.chr1:43481660C>T               | c.1270C>T  | p.Q424X     | Nonsense    |   |   |
| MYH3         | CCDS11157.1     | Pa01C | g.chr17:10483088G>C (homozygous) | c.3246G>C  | p.K1082N    | Missense    |   |   |
| NCOA2        | NM_006540       | Pa01C | g.chr8:71199554A>G (homozygous)  | c.4017A>G  | p.Q1339Q    | Synonymous  |   |   |
| NIF3L1BP1    | CCDS2900.1      | Pa01C | g.chr3:63795942C>A               | IVS6-3C>A  | Splice Site | Splice Site |   |   |
| OCA2         | CCDS10020.1     | Pa01C | g.chr15:25905345G>A              | c.1222G>A  | p.D408N     | Missense    |   |   |
| ODZ4         | ENST00000334175 | Pa01C | g.chr11:78251725C>T              | c.1104C>T  | p.D368D     | Synonymous  |   |   |
| OGT          | CCDS14414.1     | Pa01C | g.chrX:70540845T>A (homozygous)  | c.364T>A   | p.F122I     | Missense    |   |   |
| OR10R2       | NM_001004472    | Pa01C | g.chr1:155263624C>T              | c.884C>T   | p.T295M     | Missense    | Y |   |
| OR5C1        | NM_001001923    | Pa01C | g.chr9:122631133C>A              | c.368C>A   | p.A123D     | Missense    |   |   |
| OVCH1        | NM_183378       | Pa01C | g.chr12:29519302G>A              | c.1559G>A  | p.R520H     | Missense    |   | Y |
| PADI2        | CCDS177.1       | Pa01C | g.chr1:17147557G>A               | c.1378G>A  | p.V460M     | Missense    |   |   |
| PCDHA13      | NM_031864       | Pa01C | g.chr5:140235442G>A              | c.201G>A   | p.A67A      | Synonymous  |   |   |
| PCDHGC4      | CCDS4260.1      | Pa01C | g.chr5:140791793delG             | c.1283delG | fs          | INDEL       |   |   |
| PCNT         | NM_006031       | Pa01C | g.chr21:46660418A>C              | c.6158A>C  | p.E2053A    | Missense    |   |   |
| PCNXL2       | ENST00000344698 | Pa01C | g.chr1:229428820C>T              | c.1949C>T  | p.P650L     | Missense    |   |   |
| PRDM10       | CCDS8484.1      | Pa01C | g.chr11:129298492G>A             | c.1895G>A  | p.R632H     | Missense    |   |   |
| PRKD1        | CCDS9637.1      | Pa01C | g.chr14:29169824A>G              | c.1547A>G  | p.N516S     | Missense    |   |   |
| PWP2H        | NM_005049       | Pa01C | g.chr21:44365318G>A              | c.1543G>A  | p.V515I     | Missense    |   |   |
| PYHIN1       | CCDS1178.1      | Pa01C | g.chr1:155719945G>A              | c.172G>A   | p.G58S      | Missense    |   |   |
| Q8N800_HUMAN | ENST00000322516 | Pa01C | g.chr13:102185532G>A             | c.1629G>A  | p.T543T     | Synonymous  |   |   |
| Q8NH06_HUMAN | ENST00000324144 | Pa01C | g.chr17:3004230C>T (homozygous)  | c.616C>T   | p.R206C     | Missense    |   |   |
| Q96GK3_HUMAN | ENST00000315264 | Pa01C | g.chr14:103715712G>A             | c.4575G>A  | p.P1525P    | Synonymous  |   |   |
| Q9HCM3_HUMAN | ENST00000242365 | Pa01C | g.chr7:138003239C>T              | c.4941C>T  | p.P1647P    | Synonymous  |   |   |
| Q9NSI0_HUMAN | ENST00000328881 | Pa01C | g.chr21:45359175C>T              | c.127C>T   | p.R43C      | Missense    |   |   |

|           |                 |       |                                  |                  |          |            |   |   |
|-----------|-----------------|-------|----------------------------------|------------------|----------|------------|---|---|
| RHOT2     | CCDS10417.1     | Pa01C | g.chr16:663574C>A                | c.1824C>A        | p.F608L  | Missense   |   |   |
| RNUT1     | CCDS10281.1     | Pa01C | g.chr15:73700386C>T              | c.62C>T          | p.T21I   | Missense   |   |   |
| RREB1     | NM_001003699    | Pa01C | g.chr6:7127158G>A (homozygous)   | c.15G>A          | p.S5S    | Synonymous |   |   |
| SBLF      | CCDS1840.1      | Pa01C | g.chr2:48808746G>T               | c.3325G>T        | p.D1109Y | Missense   |   |   |
| SCN7A     | NM_002976       | Pa01C | g.chr2:167123728G>T              | c.1842G>T        | p.Q614H  | Missense   |   |   |
| SLC17A1   | CCDS4565.1      | Pa01C | g.chr6:25938747_25938748dupGG    | c.17_18dupG<br>G | fs       | INDEL      |   |   |
| SLC1A6    | CCDS12321.1     | Pa01C | g.chr19:14924831C>A              | c.1408C>A        | p.Q470K  | Missense   | Y | Y |
| SN        | CCDS13060.1     | Pa01C | g.chr20:3626618G>A               | c.1949G>A        | p.G650E  | Missense   |   |   |
| SNRPC     | NM_003093       | Pa01C | g.chr6:34833298C>T               | UTR-1C>T         | 5'UTR    | 5'UTR      |   |   |
| SOX3      | CCDS14669.1     | Pa01C | g.chrX:139312591C>T              | c.155C>T         | p.T52I   | Missense   |   |   |
| STIM1     | CCDS7749.1      | Pa01C | g.chr11:4069576A>G               | c.2030A>G        | p.K677R  | Missense   |   |   |
| TAF1L     | NM_153809       | Pa01C | g.chr9:32622253A>G               | c.3325A>G        | p.I1109V | Missense   |   |   |
| TEX14     | NM_198393       | Pa01C | g.chr17:54062833A>G              | c.218A>G         | p.D73G   | Missense   |   |   |
| TJP1      | NM_175610       | Pa01C | g.chr15:27798569C>T              | c.2829C>T        | p.A943A  | Synonymous |   |   |
| TLL2      | CCDS7449.1      | Pa01C | g.chr10:98163018C>T              | c.969C>T         | p.G323G  | Synonymous |   |   |
| TP53      | CCDS11118.1     | Pa01C | g.chr17:7519192A>C (homozygous)  | c.463A>C         | p.T155P  | Missense   |   | Y |
| TPO       | CCDS1642.1      | Pa01C | g.chr2:1439044C>G                | c.802C>G         | p.P268A  | Missense   |   |   |
| ZDHH4     | CCDS5352.1      | Pa01C | g.chr7:6394549G>A                | c.189G>A         | p.T63T   | Synonymous |   |   |
| ZFX1B     | CCDS2186.1      | Pa01C | g.chr2:145021235C>A              | c.164C>A         | p.P55H   | Missense   |   |   |
| ABCD2     | CCDS8734.1      | Pa02C | g.chr12:38298955C>A              | c.730C>A         | p.Q244K  | Missense   |   |   |
| ADAMTS20  | NM_175851       | Pa02C | g.chr12:42182299A>G              | c.790A>G         | p.M264V  | Missense   |   |   |
| ADAMTSL3  | CCDS10326.1     | Pa02C | g.chr15:82352540T>A (homozygous) | c.1363T>A        | p.L455M  | Missense   |   |   |
| AHNAK     | NM_001620       | Pa02C | g.chr11:62051161A>C              | c.7304A>C        | p.K2435T | Missense   |   |   |
| ATP10B    | ENST00000327245 | Pa02C | g.chr5:159963569C>G              | c.3218C>G        | p.S1073C | Missense   |   |   |
| ATP1B2    | NM_001678       | Pa02C | g.chr17:7499652A>T               | c.692A>T         | p.Y231F  | Missense   |   |   |
| C10orf93  | CCDS7672.1      | Pa02C | g.chr10:134593079G>A             | c.912G>A         | p.V304V  | Synonymous |   |   |
| C14orf121 | NM_138360       | Pa02C | g.chr14:23592778A>C (homozygous) | c.61A>C          | p.S21R   | Missense   |   |   |
| C6orf103  | ENST00000326916 | Pa02C | g.chr6:147103409T>C              | c.1273T>C        | p.F425L  | Missense   |   |   |
| C6orf213  | NM_001010852    | Pa02C | g.chr6:123360840G>A              | c.219G>A         | p.A73A   | Synonymous |   |   |
| CAPN12    | CCDS12519.1     | Pa02C | g.chr19:43924315G>A              | c.502G>A         | p.V168M  | Missense   |   |   |
| CCKAR     | CCDS3438.1      | Pa02C | g.chr4:26163779G>C (homozygous)  | c.375G>C         | p.V125V  | Synonymous |   |   |
| CCT6A     | CCDS5523.1      | Pa02C | g.chr7:55902305delG              | c.1201delG       | fs       | INDEL      |   |   |
| CD6       | CCDS7999.1      | Pa02C | g.chr11:60541907C>G              | c.1683C>G        | p.N561K  | Missense   |   |   |



|           |                 |       |                                   |            |             |             |   |
|-----------|-----------------|-------|-----------------------------------|------------|-------------|-------------|---|
| CHD7      | NM_017780       | Pa02C | g.chr8:61940604A>G                | c.8552A>G  | p.E2851G    | Missense    |   |
| CLK1      | CCDS2331.1      | Pa02C | g.chr2:201551699C>G               | IVS1-4C>G  | Splice Site | Splice Site |   |
| CLSTN2    | CCDS3112.1      | Pa02C | g.chr3:141767761C>T               | c.2836C>T  | p.L946L     | Synonymous  |   |
| DNM1L     | CCDS8728.1      | Pa02C | g.chr12:32775629G>C               | c.1273G>C  | p.E425Q     | Missense    |   |
| DYSF      | CCDS1918.1      | Pa02C | g.chr2:71706789G>A                | c.2565G>A  | p.K855K     | Synonymous  |   |
| EVI1      | CCDS3205.1      | Pa02C | g.chr3:170317123G>T               | c.675G>T   | p.M225I     | Missense    |   |
| FBN3      | CCDS12196.1     | Pa02C | g.chr19:8082567G>A                | c.4049G>A  | p.R1350H    | Missense    |   |
| FLJ12886  | NM_019108       | Pa02C | g.chr19:48943738C>T               | c.377C>T   | p.P126L     | Missense    |   |
| FLJ25530  | CCDS8456.1      | Pa02C | g.chr11:124300140C>T (homozygous) | c.121C>T   | p.R41C      | Missense    |   |
| FLJ32110  | CCDS5613.1      | Pa02C | g.chr7:88610529C>T                | c.3582C>T  | p.T1194T    | Synonymous  |   |
| FLJ32416  | CCDS12086.1     | Pa02C | g.chr19:2204762C>T                | c.293C>T   | p.A98V      | Missense    |   |
| FLJ45909  | CCDS12522.1     | Pa02C | g.chr19:44052611C>A               | c.812C>A   | p.A271E     | Missense    |   |
| FLJ46481  | CCDS3384.1      | Pa02C | g.chr4:6084945G>T (homozygous)    | IVS5-1G>T  | Splice Site | Splice Site |   |
| FLJ46481  | CCDS3384.1      | Pa02C | g.chr4:6084863C>T (homozygous)    | c.539C>T   | p.P180L     | Missense    |   |
| GALNT13   | CCDS2199.1      | Pa02C | g.chr2:155120619C>A               | c.1403C>A  | p.S468Y     | Missense    |   |
| GAS7      | CCDS11152.1     | Pa02C | g.chr17:9813791C>T (homozygous)   | c.399C>T   | p.H133H     | Synonymous  |   |
| GRIK2     | CCDS5048.1      | Pa02C | g.chr6:102609988G>T               | c.2402G>T  | p.G801V     | Missense    |   |
| GRIP2     | ENST00000273083 | Pa02C | g.chr3:14530868G>A (homozygous)   | c.1432G>A  | p.A478T     | Missense    |   |
| HKR2      | CCDS12975.1     | Pa02C | g.chr19:63538050G>C               | c.70G>C    | p.E24Q      | Missense    |   |
| HOXD4     | CCDS2269.1      | Pa02C | g.chr2:176841961G>T               | c.93G>T    | p.E31D      | Missense    |   |
| HS3ST2    | CCDS10606.1     | Pa02C | g.chr16:22834012A>G (homozygous)  | c.732A>G   | p.S244S     | Synonymous  |   |
| IRGQ      | NM_001007561    | Pa02C | g.chr19:48791322G>A               | c.9G>A     | p.P3P       | Synonymous  |   |
| KIAA1944  | CCDS9266.1      | Pa02C | g.chr12:128083339G>A              | c.3261G>A  | p.E1087E    | Synonymous  |   |
| KRAS      | CCDS8702.1      | Pa02C | g.chr12:25271542A>C (homozygous)  | c.183A>C   | p.Q61H      | Missense    | Y |
| LOC441136 | NM_001013719    | Pa02C | g.chr6:27464731C>A                | c.119C>A   | p.A40E      | Missense    |   |
| LOC63920  | NM_022090       | Pa02C | g.chr5:159754461C>G               | c.615C>G   | p.L205L     | Synonymous  |   |
| LPHN3     | NM_015236       | Pa02C | g.chr4:62738940C>T                | c.3517C>T  | p.R1173X    | Nonsense    |   |
| MGC10731  | CCDS171.1       | Pa02C | g.chr1:16304359G>A                | c.479G>A   | p.R160H     | Missense    |   |
| MGC4266   | CCDS8522.1      | Pa02C | g.chr12:3659708T>C (homozygous)   | c.297T>C   | p.D99D      | Synonymous  |   |
| MLL       | NM_005933       | Pa02C | g.chr11:117878646G>C              | c.6820G>C  | p.G2274R    | Missense    |   |
| MLL       | NM_005933       | Pa02C | g.chr11:117879596T>G              | c.7770T>G  | p.N2590K    | Missense    |   |
| MLL3      | CCDS5931.1      | Pa02C | g.chr7:151283363G>A               | c.13297G>A | p.A4433T    | Missense    | Y |
| NKX2-2    | CCDS13145.1     | Pa02C | g.chr20:21442284G>A               | c.24G>A    | p.T8T       | Synonymous  |   |
| OR5D3P    | ENST00000333984 | Pa02C | g.chr11:55250887A>T               | c.505A>T   | p.I169L     | Missense    |   |

|              |                 |       |                                  |                    |             |             |   |   |
|--------------|-----------------|-------|----------------------------------|--------------------|-------------|-------------|---|---|
| PCDH17       | NM_014459       | Pa02C | g.chr13:57106030C>T              | c.1349C>T          | p.P450L     | Missense    |   |   |
| PLCB2        | NM_004573       | Pa02C | g.chr15:38373206G>C              | c.2061G>C          | p.G687G     | Synonymous  |   |   |
| PLEKHA6      | CCDS1444.1      | Pa02C | g.chr1:200942238G>A              | c.2331G>A          | p.S777S     | Synonymous  |   |   |
| Q9H8A7_HUMAN | ENST00000053084 | Pa02C | g.chr4:15211134C>T (homozygous)  | c.1369C>T          | p.L457F     | Missense    | Y | Y |
| Q9P193_HUMAN | ENST00000359406 | Pa02C | g.chr5:60447362C>A               | c.158C>A           | p.P53Q      | Missense    |   |   |
| RIMS1        | NM_014989       | Pa02C | g.chr6:72863449G>A               | c.322G>A           | p.E108K     | Missense    |   |   |
| RREB1        | NM_001003699    | Pa02C | g.chr6:7175652C>A                | c.2321C>A          | p.T774K     | Missense    |   |   |
| RYR1         | NM_000540       | Pa02C | g.chr19:43750265G>A              | c.13527G>A         | p.G4509G    | Synonymous  |   |   |
| SCFD2        | NM_152540       | Pa02C | g.chr4:54059762C>T (homozygous)  | c.938C>T           | p.A313V     | Missense    |   |   |
| SHKBP1       | CCDS12560.1     | Pa02C | g.chr19:45786501G>A              | c.1468G>A          | p.G490S     | Missense    |   |   |
| SLC6A3       | CCDS3863.1      | Pa02C | g.chr5:1475122G>A                | c.661G>A           | p.V221M     | Missense    |   |   |
| SULF2        | CCDS13408.1     | Pa02C | g.chr20:45738667C>T              | c.1358C>T          | p.T453M     | Missense    |   |   |
| TP53         | CCDS11118.1     | Pa02C | g.chr17:7518236T>C (homozygous)  | c.770T>C           | p.L257P     | Missense    |   | Y |
| TXNDC6       | CCDS3099.1      | Pa02C | g.chr3:139505168C>T              | c.624C>T           | p.Y208Y     | Synonymous  |   |   |
| UBR2         | CCDS4870.1      | Pa02C | g.chr6:42679418G>A               | c.646G>A           | p.A216T     | Missense    |   |   |
| WBSCR17      | CCDS5540.1      | Pa02C | g.chr7:70330682G>T               | c.902G>T           | p.C301F     | Missense    |   |   |
| ACTL7B       | CCDS6771.1      | Pa03C | g.chr9:108696542C>T              | c.1224C>T          | p.S408S     | Synonymous  |   |   |
| C19orf22     | CCDS12048.1     | Pa03C | g.chr19:848479G>A (homozygous)   | c.765G>A           | p.P255P     | Synonymous  |   |   |
| C1orf14      | NM_030933       | Pa03C | g.chr1:179641193T>C              | c.698T>C           | p.L233P     | Missense    |   |   |
| CDH10        | CCDS3892.1      | Pa03C | g.chr5:24523720A>T               | c.2176A>T          | p.T726S     | Missense    |   |   |
| CNTN6        | CCDS2557.1      | Pa03C | g.chr3:1393745G>A (homozygous)   | c.2152G>A          | p.V718I     | Missense    |   |   |
| CTNNA3       | CCDS7269.1      | Pa03C | g.chr10:67710272A>C (homozygous) | c.1846A>C          | p.T616P     | Missense    |   |   |
| CYP1A1       | CCDS10268.1     | Pa03C | g.chr15:72802200C>T              | c.292C>T           | p.R98W      | Missense    |   |   |
| DLC1         | CCDS5989.1      | Pa03C | g.chr8:12990385G>A               | c.4274G>A          | p.R1425Q    | Missense    |   |   |
| DPP6         | NM_130797       | Pa03C | g.chr7:154033237G>A              | c.1423G>A          | p.D475N     | Missense    |   | Y |
| DRD3         | CCDS2978.1      | Pa03C | g.chr3:115332814C>T (homozygous) | c.847C>T           | p.R283W     | Missense    |   |   |
| EP300        | CCDS14010.1     | Pa03C | g.chr22:39881227G>A              | IVS20+1G>A         | Splice Site | Splice Site |   |   |
| FAD158       | CCDS725.1       | Pa03C | g.chr1:89890904G>A               | c.754G>A           | p.V252M     | Missense    |   |   |
| FBXO15       | CCDS12002.1     | Pa03C | g.chr18:69900151C>A              | c.1026C>A          | p.G342G     | Synonymous  |   |   |
| FLJ14011     | CCDS12944.1     | Pa03C | g.chr19:61644429T>C              | c.1747T>C          | p.Y583H     | Missense    |   |   |
| HELZ         | NM_014877       | Pa03C | g.chr17:62616878C>T              | c.613C>T           | p.Q205X     | Nonsense    |   |   |
| HIST1H4J     | CCDS4630.1      | Pa03C | g.chr6:27899909G>C               | c.28G>C            | p.G10R      | Missense    |   |   |
| ITGB4BP      | CCDS13249.1     | Pa03C | g.chr20:33331245_33331244delTT   | c.460_461del<br>TT | fs          | INDEL       |   |   |

|           |              |       |                                              |                                  |           |            |  |   |
|-----------|--------------|-------|----------------------------------------------|----------------------------------|-----------|------------|--|---|
| KIAA1755  | NM_001029864 | Pa03C | g.chr20:36302825G>A                          | c.1122G>A                        | p.M374I   | Missense   |  |   |
| KIT       | CCDS3496.1   | Pa03C | g.chr4:55405430C>T                           | c.390C>T                         | p.N130N   | Synonymous |  |   |
| KRAS      | CCDS8702.1   | Pa03C | g.chr12:25289551G>A                          | c.35G>A                          | p.G12D    | Missense   |  | Y |
| LRP1      | CCDS8932.1   | Pa03C | g.chr12:55842541C>T                          | c.2377C>T                        | p.R793X   | Nonsense   |  |   |
| MAN2A1    | NM_002372    | Pa03C | g.chr5:109230526C>T (homozygous)             | c.3363C>T                        | p.P1121P  | Synonymous |  |   |
| MAPT      | CCDS11499.1  | Pa03C | g.chr17:41451831G>T                          | c.998G>T                         | p.G333V   | Missense   |  |   |
| MLL3      | CCDS5931.1   | Pa03C | g.chr7:151329239C>T                          | c.4441C>T                        | p.R1481X  | Nonsense   |  | Y |
| PABPC5    | CCDS14460.1  | Pa03C | g.chrX:90496873G>A (homozygous)              | c.152G>A                         | p.R51H    | Missense   |  |   |
| PREX1     | CCDS13410.1  | Pa03C | g.chr20:46677552G>T                          | c.4878G>T                        | p.R1626S  | Missense   |  |   |
| PTPRK     | CCDS5137.1   | Pa03C | g.chr6:128339562A>T                          | c.3902A>T                        | p.E1301V  | Missense   |  |   |
| SLCO1A2   | CCDS8686.1   | Pa03C | g.chr12:21348642C>T                          | c.575C>T                         | p.S192F   | Missense   |  |   |
| SMARCA4   | CCDS12253.1  | Pa03C | g.chr19:11005005C>T (homozygous)             | c.3586C>T                        | p.Q1196X  | Nonsense   |  |   |
| SYT6      | CCDS871.1    | Pa03C | g.chr1:114392518C>T                          | c.457C>T                         | p.R153C   | Missense   |  |   |
| T         | CCDS5290.1   | Pa03C | g.chr6:166550664C>T                          | c.298C>T                         | p.H100Y   | Missense   |  |   |
| TBC1D14   | CCDS3394.1   | Pa03C | g.chr4:7043315G>A                            | c.82G>A                          | p.A28T    | Missense   |  |   |
| TFCP2L1   | CCDS2134.1   | Pa03C | g.chr2:121716181C>A                          | c.752C>A                         | p.T251N   | Missense   |  |   |
| TNF       | CCDS4702.1   | Pa03C | g.chr6:31653210C>T                           | c.619C>T                         | p.R207X   | Nonsense   |  |   |
| TNR       | CCDS1318.1   | Pa03C | g.chr1:172104173G>A                          | c.736G>A                         | p.V246M   | Missense   |  |   |
| TP53      | CCDS11118.1  | Pa03C | g.chr17:7514721T>C (homozygous)              | c.1031T>C                        | p.L344P   | Missense   |  | Y |
| TTN       | NM_133378    | Pa03C | g.chr2:179236181A>G                          | c.87585A>G                       | p.P29195P | Synonymous |  |   |
| VWF       | CCDS8539.1   | Pa03C | g.chr12:5929302C>G                           | c.8164C>G                        | p.P2722A  | Missense   |  |   |
| WDR1      | NM_005112    | Pa03C | g.chr4:9794081G>C                            | c.63G>C                          | p.K21N    | Missense   |  |   |
| XKR4      | NM_052898    | Pa03C | g.chr8:56177818C>T                           | c.216C>T                         | p.G72G    | Synonymous |  |   |
| ZBTB7     | CCDS12119.1  | Pa03C | g.chr19:4005888G>T                           | c.343G>T                         | p.E115X   | Nonsense   |  |   |
| AARS      | NM_001605    | Pa04C | g.chr16:68857047C>T                          | c.1242C>T                        | p.L414L   | Synonymous |  |   |
| ADAM11    | CCDS11486.1  | Pa04C | g.chr17:40210852A>C                          | c.2077A>C                        | p.S693R   | Missense   |  |   |
| ARMC7     | CCDS11714.1  | Pa04C | g.chr17:70618173_70618184delGCCA<br>ACCTCGCC | c.112_123del<br>GCCAACCTCG<br>CC | fs        | INDEL      |  |   |
| ARSA      | CCDS14100.1  | Pa04C | g.chr22:49355454C>T                          | c.630C>T                         | p.A210A   | Synonymous |  |   |
| BC37295_3 | NM_001005850 | Pa04C | g.chr19:61868151C>T                          | c.294C>T                         | p.D98D    | Synonymous |  |   |
| C15orf41  | NM_032499    | Pa04C | g.chr15:34887823G>C                          | c.429G>C                         | p.G143G   | Synonymous |  |   |
| C1orf25   | CCDS1366.1   | Pa04C | g.chr1:181838554G>C                          | c.1354G>C                        | p.V452L   | Missense   |  |   |
| C1QL2     | NM_182528    | Pa04C | g.chr2:119631996G>C                          | c.80G>C                          | p.G27A    | Missense   |  |   |

|               |                 |       |                                  |                   |             |             |   |   |
|---------------|-----------------|-------|----------------------------------|-------------------|-------------|-------------|---|---|
| C20orf42      | CCDS13098.1     | Pa04C | g.chr20:6005895G>T               | c.1959G>T         | p.L653F     | Missense    |   |   |
| CNTN5         | NM_014361       | Pa04C | g.chr11:99195617G>T              | c.188G>T          | p.S63I      | Missense    | Y | Y |
| CNTNAP2       | CCDS5889.1      | Pa04C | g.chr7:146530473G>T              | c.1623G>T         | p.P541P     | Synonymous  |   |   |
| DBT           | CCDS767.1       | Pa04C | g.chr1:100388309G>A              | c.979G>A          | p.A327T     | Missense    |   |   |
| DCHS1         | CCDS7771.1      | Pa04C | g.chr11:6601843G>T               | c.7640G>T         | p.G2547V    | Missense    |   |   |
| DKFZP586P0123 | NM_015531       | Pa04C | g.chr11:73466993C>G              | c.4418C>G         | p.A1473G    | Missense    |   |   |
| DPP6          | NM_130797       | Pa04C | g.chr7:154118657G>A              | c.2332G>A         | p.A778T     | Missense    |   | Y |
| EBF3          | NM_001005463    | Pa04C | g.chr10:131561760C>T             | c.727C>T          | p.R243W     | Missense    |   |   |
| ENTH          | NM_014666       | Pa04C | g.chr5:157154482T>C              | IVS9+2T>C         | Splice Site | Splice Site |   |   |
| FLJ35843      | CCDS9151.1      | Pa04C | g.chr12:109780527A>G             | c.587A>G          | p.Y196C     | Missense    |   |   |
| FOXP2         | CCDS5760.1      | Pa04C | g.chr7:113862679A>G              | c.392A>G          | p.Q131R     | Missense    |   |   |
| GPR82         | CCDS14259.1     | Pa04C | g.chrX:41343413C>A (homozygous)  | c.880C>A          | p.L294I     | Missense    |   |   |
| HMGCLL1       | NM_019036       | Pa04C | g.chr6:55489347C>T               | c.401C>T          | p.T134I     | Missense    |   |   |
| HOXC9         | CCDS8869.1      | Pa04C | g.chr12:52680669G>T (homozygous) | c.430G>T          | p.G144C     | Missense    |   |   |
| KCNMA1        | CCDS7352.1      | Pa04C | g.chr10:78538318G>A              | c.1150G>A         | p.V384I     | Missense    |   |   |
| KCNT1         | NM_020822       | Pa04C | g.chr9:135890629C>T              | c.2132C>T         | p.A711V     | Missense    |   |   |
| KRAS          | CCDS8702.1      | Pa04C | g.chr12:25289551G>T (homozygous) | c.35G>T           | p.G12V      | Missense    |   | Y |
| LENG8         | CCDS12894.1     | Pa04C | g.chr19:59658439C>T              | c.906C>T          | p.T302T     | Synonymous  |   |   |
| LOC123872     | CCDS10943.1     | Pa04C | g.chr16:82750807G>A              | c.507G>A          | p.P169P     | Synonymous  |   |   |
| LPAL2         | ENST00000342479 | Pa04C | g.chr6:160858399G>A              | c.300G>A          | p.T100T     | Synonymous  |   |   |
| MEP1A         | CCDS4918.1      | Pa04C | g.chr6:46905073T>C               | c.950T>C          | p.F317S     | Missense    | Y | Y |
| MGC15523      | CCDS11780.1     | Pa04C | g.chr17:76840601A>G              | c.1934A>G         | p.D645G     | Missense    |   |   |
| MGC20806      | CCDS11797.1     | Pa04C | g.chr17:77576240C>T              | c.429C>T          | p.N143N     | Synonymous  |   |   |
| MKL2          | NM_014048       | Pa04C | g.chr16:14247913C>A              | c.1295C>A         | p.P432H     | Missense    |   |   |
| MMP9          | CCDS13390.1     | Pa04C | g.chr20:44073223G>A              | c.684G>A          | p.A228A     | Synonymous  |   |   |
| MORC2         | NM_014941       | Pa04C | g.chr22:29662658A>G              | c.395A>G          | p.D132G     | Missense    |   |   |
| MTMR12        | NM_019061       | Pa04C | g.chr5:32269694_32269695delCT    | c.1622_1623 delCT | fs          | INDEL       |   |   |
| MUC2          | NM_002457       | Pa04C | g.chr11:1093892G>A               | c.8179G>A         | p.V2727I    | Missense    |   |   |
| NAALADL2      | NM_207015       | Pa04C | g.chr3:176647739C>T              | c.1111C>T         | p.R371X     | Nonsense    |   |   |
| NAV2          | CCDS7850.1      | Pa04C | g.chr11:19917888A>C              | c.2139A>C         | p.E713D     | Missense    |   |   |
| NCDN          | CCDS392.1       | Pa04C | g.chr1:35698033C>T               | c.1523C>T         | p.S508L     | Missense    |   |   |
| NFIA          | CCDS615.1       | Pa04C | g.chr1:61265954G>A               | c.140G>A          | p.R47H      | Missense    |   |   |
| OBSCN         | CCDS1570.1      | Pa04C | g.chr1:224774783G>A              | c.7832G>A         | p.R2611H    | Missense    |   |   |

|              |                 |       |                                                                          |                                                                         |             |             |   |  |
|--------------|-----------------|-------|--------------------------------------------------------------------------|-------------------------------------------------------------------------|-------------|-------------|---|--|
| OR10R2       | NM_001004472    | Pa04C | g.chr1:155263066C>G                                                      | c.326C>G                                                                | p.A109G     | Missense    | Y |  |
| OR13C3       | NM_001001961    | Pa04C | g.chr9:104378262C>A                                                      | c.388C>A                                                                | p.Q130K     | Missense    |   |  |
| PER3         | CCDS89.1        | Pa04C | g.chr1:7821471_7821474delCGGC                                            | c.2192_2195<br>delCGGC                                                  | fs          | INDEL       |   |  |
| PIK3CG       | CCDS5739.1      | Pa04C | g.chr7:106103628G>A                                                      | c.1671G>A                                                               | p.A557A     | Synonymous  |   |  |
| PTPN12       | CCDS5592.1      | Pa04C | g.chr7:76900982G>C                                                       | c.1335G>C                                                               | p.E445D     | Missense    |   |  |
| Q8N800_HUMAN | ENST00000322516 | Pa04C | g.chr13:102185624G>T                                                     | c.1537G>T                                                               | p.E513X     | Nonsense    |   |  |
| Q9H5F0_HUMAN | ENST00000360484 | Pa04C | g.chr1:241614343C>A                                                      | c.101C>A                                                                | p.P34H      | Missense    |   |  |
| Q9H5F0_HUMAN | ENST00000360484 | Pa04C | g.chr1:241614381C>A                                                      | c.139C>A                                                                | p.P47T      | Missense    |   |  |
| RARB         | CCDS2642.1      | Pa04C | g.chr3:25517765G>A                                                       | c.395G>A                                                                | p.R132Q     | Missense    |   |  |
| RASGRP3      | NM_170672       | Pa04C | g.chr2:33660595A>G                                                       | IVS5-2A>G                                                               | Splice Site | Splice Site |   |  |
| RGS11        | CCDS10403.1     | Pa04C | g.chr16:259383C>T                                                        | c.1227C>T                                                               | p.R409R     | Synonymous  |   |  |
| RODH         | CCDS8925.1      | Pa04C | g.chr12:55464963C>T                                                      | c.632C>T                                                                | p.T211M     | Missense    |   |  |
| RYR2         | NM_001035       | Pa04C | g.chr1:233906412G>A                                                      | c.796G>A                                                                | p.A266T     | Missense    |   |  |
| SCNN1B       | CCDS10609.1     | Pa04C | g.chr16:23299368G>A                                                      | c.1668G>A                                                               | p.V556V     | Synonymous  |   |  |
| SEMA4D       | CCDS6685.1      | Pa04C | g.chr9:89223296C>T                                                       | c.2466C>T                                                               | p.I822I     | Synonymous  |   |  |
| SENP1        | NM_014554       | Pa04C | g.chr12:46745163dupA                                                     | c.1227dupA                                                              | fs          | INDEL       |   |  |
| STAMBP       | CCDS1929.1      | Pa04C | g.chr2:73986261A>T                                                       | c.468A>T                                                                | p.Q156H     | Missense    |   |  |
| SULF1        | CCDS6204.1      | Pa04C | g.chr8:70695902C>T (homozygous)                                          | c.1456C>T                                                               | p.R486W     | Missense    |   |  |
| TBX15        | NM_152380       | Pa04C | g.chr1:119139811C>T                                                      | c.1077C>T                                                               | p.Y359Y     | Synonymous  |   |  |
| VDAC2        | CCDS7348.1      | Pa04C | g.chr10:76648965G>A                                                      | c.289G>A                                                                | p.A97T      | Missense    |   |  |
| VPS13D       | NM_018156       | Pa04C | g.chr1:12287936G>A                                                       | c.5942G>A                                                               | p.R1981H    | Missense    |   |  |
| WASF3        | CCDS9318.1      | Pa04C | g.chr13:26157827A>G                                                      | c.1354A>G                                                               | p.I452V     | Missense    |   |  |
| XR_017918.1  | ENST00000258651 | Pa04C | g.chr13:53913399G>A                                                      | c.53G>A                                                                 | p.R18H      | Missense    |   |  |
| ZNF136       | NM_003437       | Pa04C | g.chr19:12158475G>C                                                      | c.282G>C                                                                | p.K94N      | Missense    |   |  |
| ZNF443       | NM_005815       | Pa04C | g.chr19:12402716A>C                                                      | c.1270A>C                                                               | p.K424Q     | Missense    |   |  |
| ZNF507       | NM_014910       | Pa04C | g.chr19:37536920T>C                                                      | c.1344T>C                                                               | p.T448T     | Synonymous  |   |  |
| ADAMTS15     | CCDS8488.1      | Pa05X | g.chr11:129837197G>A                                                     | c.1096G>A                                                               | p.V366M     | Missense    |   |  |
| ADAMTS16     | NM_139056       | Pa05X | g.chr5:5292308C>T                                                        | c.2199C>T                                                               | p.D733D     | Synonymous  |   |  |
| BC37295_3    | NM_001005850    | Pa05X | g.chr19:61867445_61867409delGGC<br>GCGCTCTCAGCCAGAGCGCCTCTCTG<br>GCCGAGC | c.1000_1037<br>delGGCGCGC<br>TCTTCAGCCA<br>GAGCGCCTCT<br>CTGGCCGAG<br>C | indel       | INDEL       |   |  |

|                 |                 |       |                                   |           |          |            |   |   |
|-----------------|-----------------|-------|-----------------------------------|-----------|----------|------------|---|---|
| CAND2           | ENST00000295989 | Pa05X | g.chr3:12833092C>T                | c.1382C>T | p.P461L  | Missense   |   |   |
| CEECAM1         | CCDS6901.1      | Pa05X | g.chr9:128266306C>T (homozygous)  | c.391C>T  | p.R131C  | Missense   |   |   |
| CLEC4M          | CCDS12187.1     | Pa05X | g.chr19:7739763C>T                | c.1089C>T | p.S363S  | Synonymous |   |   |
| CLUAP1          | NM_015041       | Pa05X | g.chr16:3509954A>C                | c.630A>C  | p.E210D  | Missense   |   |   |
| CPN1            | CCDS7486.1      | Pa05X | g.chr10:101806789C>T (homozygous) | c.982C>T  | p.R328W  | Missense   |   |   |
| DNAH11          | NM_003777       | Pa05X | g.chr7:21432055C>T                | c.4367C>T | p.A1456V | Missense   |   |   |
| DNAPTP6         | NM_015535       | Pa05X | g.chr2:201109563C>G               | c.283C>G  | p.P95A   | Missense   |   |   |
| ENST00000298876 | ENST00000298876 | Pa05X | g.chr12:27514906G>T               | c.75G>T   | p.L25L   | Synonymous |   |   |
| EVPL            | CCDS11737.1     | Pa05X | g.chr17:71517727C>T               | c.3154C>T | p.R1052W | Missense   |   |   |
| F13A1           | CCDS4496.1      | Pa05X | g.chr6:6119855A>G                 | c.1704A>G | p.E568E  | Synonymous |   |   |
| FBXW8           | CCDS9182.1      | Pa05X | g.chr12:115928634C>G              | c.1734C>G | p.S578S  | Synonymous |   |   |
| FGD2            | CCDS4829.1      | Pa05X | g.chr6:37103268G>A                | c.1691G>A | p.R564Q  | Missense   |   |   |
| FLJ23588        | CCDS14049.1     | Pa05X | g.chr22:42297206C>G               | c.3292C>G | p.L1098V | Missense   |   |   |
| GPR133          | CCDS9272.1      | Pa05X | g.chr12:130141219C>T              | c.2245C>T | p.H749Y  | Missense   |   |   |
| HS3ST5          | NM_153612       | Pa05X | g.chr6:114490631C>T (homozygous)  | c.72C>T   | p.L24L   | Synonymous |   |   |
| INHBB           | CCDS2132.1      | Pa05X | g.chr2:120823305C>T               | c.849C>T  | p.G283G  | Synonymous |   |   |
| IXL             | NM_017592       | Pa05X | g.chr19:44573866C>T               | c.27C>T   | p.R9R    | Synonymous |   |   |
| KRAS            | CCDS8702.1      | Pa05X | g.chr12:25289551G>A               | c.35G>A   | p.G12D   | Missense   |   | Y |
| LMTK2           | CCDS5654.1      | Pa05X | g.chr7:97467809C>T                | c.3381C>T | p.A1127A | Synonymous | Y |   |
| LMTK2           | CCDS5654.1      | Pa05X | g.chr7:97467810T>C                | c.3382T>C | p.L1128L | Synonymous | Y |   |
| LOC131873       | ENST00000358511 | Pa05X | g.chr3:131769843C>G               | c.1999C>G | p.L667V  | Missense   |   |   |
| MAP4K3          | CCDS1803.1      | Pa05X | g.chr2:39448258G>A                | c.1051G>A | p.E351K  | Missense   |   |   |
| MGC15875        | CCDS4434.1      | Pa05X | g.chr5:177582153G>T               | c.736G>T  | p.D246Y  | Missense   |   |   |
| MUF1            | CCDS533.1       | Pa05X | g.chr1:46476057C>A                | c.205C>A  | p.P69T   | Missense   |   |   |
| MUM1L1          | NM_152423       | Pa05X | g.chrX:105255948C>T (homozygous)  | c.378C>T  | p.S126S  | Synonymous |   |   |
| MYO15A          | NM_016239       | Pa05X | g.chr17:17982902C>T               | c.5060C>T | p.P1687L | Missense   |   |   |
| OR2A1           | ENST00000318244 | Pa05X | g.chr1:244423744C>A               | c.633C>A  | p.F211L  | Missense   |   |   |
| Q5JX50_HUMAN    | ENST00000325076 | Pa05X | g.chr20:33653256C>T               | c.672C>T  | p.R224R  | Synonymous |   |   |
| Q8NCK2_HUMAN    | ENST00000325720 | Pa05X | g.chr17:71097866G>A               | c.606G>A  | p.K202K  | Synonymous |   |   |
| SCNN1G          | CCDS10608.1     | Pa05X | g.chr16:23134233G>A               | c.1892G>A | p.R631H  | Missense   |   |   |
| SIX2            | CCDS1822.1      | Pa05X | g.chr2:45145131G>A                | c.705G>A  | p.P235P  | Synonymous |   |   |
| SLC1A6          | CCDS12321.1     | Pa05X | g.chr19:14928457G>A               | c.1000G>A | p.V334I  | Missense   | Y | Y |
| TAS2R41         | NM_176883       | Pa05X | g.chr7:142692636C>T               | c.834C>T  | p.V278V  | Synonymous |   |   |
| TP53            | CCDS11118.1     | Pa05X | g.chr17:7518284C>T (homozygous)   | c.722C>T  | p.S241F  | Missense   |   | Y |

|                 |                 |       |                                                         |                                                  |           |            |   |   |
|-----------------|-----------------|-------|---------------------------------------------------------|--------------------------------------------------|-----------|------------|---|---|
| TTN             | NM_133378       | Pa05X | g.chr2:179311902G>A                                     | c.37451G>A                                       | p.C12484Y | Missense   |   |   |
| ULBP1           | CCDS5223.1      | Pa05X | g.chr6:150382336G>A (homozygous)                        | c.351G>A                                         | p.E117E   | Synonymous |   |   |
| VPS39           | CCDS10083.1     | Pa05X | g.chr15:40264103G>A                                     | c.622G>A                                         | p.A208T   | Missense   |   |   |
| ZMAT4           | NM_024645       | Pa05X | g.chr8:40802278C>T                                      | c.75C>T                                          | p.S25S    | Synonymous |   |   |
| ABCA1           | CCDS6762.1      | Pa07C | g.chr9:104672874C>T                                     | c.1779C>T                                        | p.F593F   | Synonymous |   |   |
| ACD             | CCDS10842.1     | Pa07C | g.chr16:66249088G>A                                     | c.1548G>A                                        | p.R516R   | Synonymous |   |   |
| ADAM21          | CCDS9804.1      | Pa07C | g.chr14:69994312G>A                                     | c.343G>A                                         | p.V115M   | Missense   |   |   |
| ADAMTS2         | CCDS4444.1      | Pa07C | g.chr5:178487615C>T                                     | c.2568C>T                                        | p.Y856Y   | Synonymous |   |   |
| AHR             | CCDS5366.1      | Pa07C | g.chr7:17152357G>T                                      | c.1668G>T                                        | p.M556I   | Missense   |   |   |
| ALDH1A3         | CCDS10389.1     | Pa07C | g.chr15:99237656C>T                                     | c.21C>T                                          | p.A7A     | Synonymous |   |   |
| ANKRD6          | NM_014942       | Pa07C | g.chr6:90388378G>A                                      | c.809G>A                                         | p.R270H   | Missense   |   |   |
| ARID1A          | CCDS285.1       | Pa07C | g.chr1:26784089C>T                                      | c.3826C>T                                        | p.R1276X  | Nonsense   |   |   |
| B4GALT7         | CCDS4429.1      | Pa07C | g.chr5:176964045C>T                                     | c.310C>T                                         | p.R104C   | Missense   |   |   |
| CHD5            | CCDS57.1        | Pa07C | g.chr1:6101062C>T                                       | c.5622C>T                                        | p.D1874D  | Synonymous |   |   |
| CNTN5           | NM_014361       | Pa07C | g.chr11:99631845C>T                                     | c.2149C>T                                        | p.Q717X   | Nonsense   | Y | Y |
| CUL4B           | NM_003588       | Pa07C | g.chrX:119476101C>T                                     | c.329C>T                                         | p.S110F   | Missense   |   |   |
| DGKA            | CCDS8896.1      | Pa07C | g.chr12:54621336G>A                                     | c.1135G>A                                        | p.V379I   | Missense   |   |   |
| DGKK            | NM_001013742    | Pa07C | g.chrX:50046399_50046376delTGCCA<br>CAGAGCCGGCCCCAGAACC | c.315_338del<br>TGCCACAGA<br>GCCGGCCCC<br>AGAACC | indel     | INDEL      |   |   |
| DHX33           | CCDS11072.1     | Pa07C | g.chr17:5312806T>C (homozygous)                         | c.98T>C                                          | p.V33A    | Missense   |   |   |
| EIF2AK2         | CCDS1786.1      | Pa07C | g.chr2:37261448C>T                                      | c.919C>T                                         | p.R307C   | Missense   |   |   |
| EIF5B           | NM_015904       | Pa07C | g.chr2:99469722G>A                                      | c.3112G>A                                        | p.D1038N  | Missense   |   |   |
| EMILIN1         | CCDS1733.1      | Pa07C | g.chr2:27219041G>A                                      | c.2548G>A                                        | p.G850R   | Missense   |   |   |
| ENST00000309390 | ENST00000309390 | Pa07C | g.chr6:7933061C>T                                       | c.1293C>T                                        | p.H431H   | Synonymous |   |   |
| ENST00000333971 | ENST00000333971 | Pa07C | g.chr18:70208268G>A (homozygous)                        | c.257G>A                                         | p.R86H    | Missense   |   |   |
| FLJ38377        | CCDS2164.1      | Pa07C | g.chr2:131354922G>A                                     | c.1538G>A                                        | p.R513H   | Missense   |   |   |
| FLJ41993        | NM_001001694    | Pa07C | g.chr22:48739118T>C                                     | c.679T>C                                         | p.C227R   | Missense   |   |   |
| FREM2           | NM_207361       | Pa07C | g.chr13:38164611C>T                                     | c.5130C>T                                        | p.L1710L  | Synonymous |   |   |
| GALNT8          | CCDS8533.1      | Pa07C | g.chr12:4740462C>T                                      | c.1251C>T                                        | p.Y417Y   | Synonymous |   |   |
| GLI3            | CCDS5465.1      | Pa07C | g.chr7:41961112C>T                                      | c.320C>T                                         | p.T107M   | Missense   |   |   |
| GRM6            | CCDS4442.1      | Pa07C | g.chr5:178354480G>A                                     | c.72G>A                                          | p.A24A    | Synonymous |   |   |
| IL12RB1         | NM_153701       | Pa07C | g.chr19:18048135C>T                                     | c.552C>T                                         | p.G184G   | Synonymous |   |   |

|              |                 |       |                                  |                   |          |            |   |   |
|--------------|-----------------|-------|----------------------------------|-------------------|----------|------------|---|---|
| KCNA3        | CCDS828.1       | Pa07C | g.chr1:110928628G>A              | c.690G>A          | p.S230S  | Synonymous |   |   |
| KIN          | CCDS7080.1      | Pa07C | g.chr10:7838072G>A               | c.1159G>A         | p.E387K  | Missense   |   |   |
| KRAS         | CCDS8702.1      | Pa07C | g.chr12:25289551G>A              | c.35G>A           | p.G12D   | Missense   |   | Y |
| LOC113386    | NM_138781       | Pa07C | g.chr19:63515554G>T              | c.208G>T          | p.E70X   | Nonsense   |   |   |
| LOC163131    | NM_001005851    | Pa07C | g.chr19:45232382C>T              | c.2224C>T         | p.Q742X  | Nonsense   |   |   |
| MARS         | CCDS8942.1      | Pa07C | g.chr12:56170671G>A              | c.747G>A          | p.P249P  | Synonymous |   |   |
| MCTP2        | NM_018349       | Pa07C | g.chr15:92689362C>T              | c.970C>T          | p.R324C  | Missense   |   |   |
| MEP1A        | CCDS4918.1      | Pa07C | g.chr6:46905163delT              | c.1037delT        | fs       | INDEL      | Y | Y |
| MLL5         | NM_182931       | Pa07C | g.chr7:104325651delC             | c.1661delC        | fs       | INDEL      |   |   |
| MSLN         | NM_013404       | Pa07C | g.chr16:755236G>A                | c.636G>A          | p.P212P  | Synonymous |   |   |
| MYH2         | CCDS11156.1     | Pa07C | g.chr17:10369514C>T              | c.4516C>T         | p.R1506X | Nonsense   |   |   |
| NOD3         | NM_178844       | Pa07C | g.chr16:3567189dupC              | c.27dupC          | fs       | INDEL      |   |   |
| OR4E2        | NM_001001912    | Pa07C | g.chr14:21203968G>A              | c.832G>A          | p.V278I  | Missense   |   |   |
| OR6A2        | CCDS7772.1      | Pa07C | g.chr11:6773137C>T               | c.379C>T          | p.R127C  | Missense   |   |   |
| PCDH15       | CCDS7248.1      | Pa07C | g.chr10:55666676G>T              | c.898G>T          | p.V300F  | Missense   |   |   |
| PCDHB3       | CCDS4245.1      | Pa07C | g.chr5:140462670C>T              | c.2253C>T         | p.Y751Y  | Synonymous |   |   |
| PCSK2        | CCDS13125.1     | Pa07C | g.chr20:17382461C>T (homozygous) | c.960C>T          | p.D320D  | Synonymous |   |   |
| PFAS         | CCDS11136.1     | Pa07C | g.chr17:8111125C>A               | c.3022C>A         | p.R1008R | Synonymous |   |   |
| PRR12        | ENST00000246798 | Pa07C | g.chr19:54794366G>A              | c.1244G>A         | p.G415D  | Missense   |   |   |
| Q7Z2Q7_HUMAN | ENST00000334994 | Pa07C | g.chr5:61912677T>C               | c.1653T>C         | p.F551F  | Synonymous |   |   |
| Q9H8A7_HUMAN | ENST00000053084 | Pa07C | g.chr4:15264100_15264101delTC    | c.3762_3763 delTC | fs       | INDEL      | Y | Y |
| SCN5A        | NM_198056       | Pa07C | g.chr3:38567493G>A               | c.5374G>A         | p.D1792N | Missense   |   |   |
| SGEF         | NM_015595       | Pa07C | g.chr3:155324933G>T              | c.1120G>T         | p.E374X  | Nonsense   |   |   |
| SLC2A5       | CCDS99.1        | Pa07C | g.chr1:9034296C>T                | c.714C>T          | p.R238R  | Synonymous |   |   |
| SLC6A2       | CCDS10754.1     | Pa07C | g.chr16:54285456dupT             | c.952dupT         | fs       | INDEL      |   |   |
| SMAD4        | CCDS11950.1     | Pa07C | g.chr18:46857030C>T (homozygous) | c.1333C>T         | p.R445X  | Nonsense   |   | Y |
| SMOC1        | CCDS9798.1      | Pa07C | g.chr14:69489919C>T              | c.295C>T          | p.R99W   | Missense   |   |   |
| SNX26        | CCDS12477.1     | Pa07C | g.chr19:40968054C>T              | c.1845C>T         | p.T615T  | Synonymous |   |   |
| STAC         | CCDS2662.1      | Pa07C | g.chr3:36502658C>T               | c.600C>T          | p.Y200Y  | Synonymous |   |   |
| SYNE1        | CCDS5236.1      | Pa07C | g.chr6:152743723dupA             | c.14208dupA       | fs       | INDEL      |   |   |
| TBX18        | ENST00000330469 | Pa07C | g.chr6:85529113C>T               | c.110C>T          | p.P37L   | Missense   |   |   |
| TESSP2       | NM_182702       | Pa07C | g.chr3:46849470G>T               | c.602G>T          | p.W201L  | Missense   |   |   |
| TIMELESS     | CCDS8918.1      | Pa07C | g.chr12:55113483T>G              | c.378T>G          | p.S126R  | Missense   |   |   |



|          |                 |       |                                  |            |          |            |   |   |
|----------|-----------------|-------|----------------------------------|------------|----------|------------|---|---|
| TP53     | CCDS11118.1     | Pa07C | g.chr17:7519119A>G (homozygous)  | c.536A>G   | p.H179R  | Missense   |   | Y |
| WDR42B   | ENST00000329763 | Pa07C | g.chrX:27524862G>A (homozygous)  | c.193G>A   | p.D65N   | Missense   |   |   |
| XPNPEP1  | CCDS7560.1      | Pa07C | g.chr10:111657509C>A             | c.47C>A    | p.A16D   | Missense   |   |   |
| ZNF537   | CCDS12421.1     | Pa07C | g.chr19:36461398C>T              | c.592C>T   | p.R198W  | Missense   |   |   |
| AKAP12   | CCDS5229.1      | Pa08C | g.chr6:151719101G>A              | c.268G>A   | p.G90S   | Missense   |   |   |
| ATP2B3   | CCDS14722.1     | PA08C | g.chrX:152336396C>T (homozygous) | c.1628C>T  | p.T543M  | Missense   |   |   |
| B3GALT1  | CCDS2227.1      | Pa08C | g.chr2:168551355C>T              | c.299C>T   | p.T100M  | Missense   |   |   |
| BCL2A1   | CCDS10312.1     | Pa08C | g.chr15:78040564G>C (homozygous) | c.428G>C   | p.G143A  | Missense   |   |   |
| C13orf22 | CCDS9336.1      | Pa08C | g.chr13:30130832C>G              | c.2618C>G  | p.S873C  | Missense   |   |   |
| C1RL     | CCDS8573.1      | Pa08C | g.chr12:7140801C>T (homozygous)  | c.792C>T   | p.I264I  | Synonymous |   |   |
| C20orf26 | NM_015585       | Pa08C | g.chr20:20180359G>C              | c.2280G>C  | p.E760D  | Missense   |   |   |
| CCNB3    | CCDS14331.1     | Pa08C | g.chrX:49885977A>C               | c.1772A>C  | p.K591T  | Missense   |   |   |
| CCNYL3   | ENST00000332505 | Pa08C | g.chr16:34132052T>G              | c.248T>G   | p.L83R   | Missense   |   |   |
| CGN      | CCDS999.1       | Pa08C | g.chr1:148309864A>C              | c.1358A>C  | p.K453T  | Missense   |   |   |
| CMYA5    | NM_153610       | Pa08C | g.chr5:79062356C>G               | c.2012C>G  | p.T671R  | Missense   |   |   |
| CNGB3    | CCDS6244.1      | Pa08C | g.chr8:87821047A>C               | c.163A>C   | p.T55P   | Missense   |   |   |
| CNTNAP4  | CCDS10924.1     | Pa08C | g.chr16:74946796G>A              | c.202G>A   | p.A68T   | Missense   |   |   |
| CTNND2   | CCDS3881.1      | Pa08C | g.chr5:11212793C>T               | c.2054C>T  | p.A685V  | Missense   |   |   |
| DICER1   | CCDS9931.1      | Pa08C | g.chr14:94668662C>G              | c.250C>G   | p.Q84E   | Missense   |   |   |
| DNAH8    | CCDS4838.1      | Pa08C | g.chr6:38985291C>G               | c.8882C>G  | p.A2961G | Missense   |   |   |
| DOCK2    | CCDS4371.1      | Pa08C | g.chr5:169041455A>C              | c.600A>C   | p.E200D  | Missense   | Y |   |
| EHMT1    | CCDS7050.1      | Pa08C | g.chr9:137948184C>G              | c.1939C>G  | p.P647A  | Missense   |   |   |
| EML1     | NM_004434       | Pa08C | g.chr14:99475370G>A              | c.2275G>A  | p.D759N  | Missense   |   |   |
| FAT4     | CCDS3732.1      | Pa08C | g.chr4:126770404G>A              | c.9545G>A  | p.G3182D | Missense   |   |   |
| FLJ10324 | NM_018059       | Pa08C | g.chr7:4690651G>A                | c.361G>A   | p.D121N  | Missense   |   |   |
| FLJ21986 | NM_024913       | Pa08C | g.chr7:120362439A>G              | c.1355A>G  | p.N452S  | Missense   |   |   |
| GABRA1   | CCDS4357.1      | Pa08C | g.chr5:161256762C>A              | c.1127C>A  | p.T376N  | Missense   |   |   |
| GPC2     | CCDS5689.1      | Pa08C | g.chr7:99414178C>A               | c.1045C>A  | p.P349T  | Missense   |   |   |
| GRM8     | CCDS5794.1      | Pa08C | g.chr7:125767758T>G              | c.1629T>G  | p.G543G  | Synonymous |   |   |
| HPCAL1   | CCDS1671.1      | Pa08C | g.chr2:10517488C>T               | c.525C>T   | p.S175S  | Synonymous |   |   |
| HSGT1    | CCDS7321.1      | Pa08C | g.chr10:74590241G>A              | c.280G>A   | p.V94I   | Missense   |   |   |
| ITPR1    | NM_002222       | Pa08C | g.chr3:4658919G>A (homozygous)   | c.509G>A   | p.R170Q  | Missense   |   |   |
| JPH4     | CCDS9603.1      | Pa08C | g.chr14:23110276dupG             | c.1504dupG | fs       | INDEL      |   |   |
| KAL1     | CCDS14130.1     | Pa08C | g.chrX:8374868A>C (homozygous)   | c.484A>C   | p.K162Q  | Missense   |   |   |

|                |                 |       |                                   |            |             |             |  |   |
|----------------|-----------------|-------|-----------------------------------|------------|-------------|-------------|--|---|
| KIAA0082       | CCDS4835.1      | Pa08C | g.chr6:37537819T>C                | c.1288T>C  | p.F430L     | Missense    |  |   |
| KIAA1957       | ENST00000332235 | Pa08C | g.chr19:358514G>A                 | c.1028G>A  | p.R343Q     | Missense    |  |   |
| KRAS           | CCDS8702.1      | Pa08C | g.chr12:25289551G>T               | c.35G>T    | p.G12V      | Missense    |  | Y |
| KRTAP11-1      | CCDS13608.1     | Pa08C | g.chr21:31175392C>G               | c.323C>G   | p.S108C     | Missense    |  |   |
| LGR6           | CCDS1424.1      | Pa08C | g.chr1:199019324G>A               | c.2080G>A  | p.V694I     | Missense    |  |   |
| LOC167127      | CCDS3914.1      | Pa08C | g.chr5:36085237G>A                | c.354G>A   | p.A118A     | Synonymous  |  |   |
| LRRTM4         | NM_024993       | Pa08C | g.chr2:77657374A>T                | c.1276A>T  | p.I426F     | Missense    |  |   |
| MLL2           | NM_003482       | Pa08C | g.chr12:47730476G>A               | c.2337G>A  | p.P779P     | Synonymous  |  |   |
| MRGX1          | CCDS7846.1      | Pa08C | g.chr11:18912631A>C (homozygous)  | c.277A>C   | p.T93P      | Missense    |  |   |
| MRGX1          | CCDS7846.1      | Pa08C | g.chr11:18912623T>C               | c.285T>C   | p.S95S      | Synonymous  |  |   |
| MTR            | CCDS1614.1      | Pa08C | g.chr1:233363178G>A               | c.2470G>A  | p.A824T     | Missense    |  |   |
| NCL            | NM_005381       | Pa08C | g.chr2:232146931A>C               | c.1621A>C  | p.N541H     | Missense    |  |   |
| NEB            | NM_004543       | Pa08C | g.chr2:152252196C>G               | c.12198C>G | p.D4066E    | Missense    |  |   |
| NEO1           | CCDS10247.1     | Pa08C | g.chr15:71357558C>G (homozygous)  | c.3227C>G  | p.P1076R    | Missense    |  |   |
| NLGN1          | CCDS3222.1      | Pa08C | g.chr3:175479470A>C               | c.977A>C   | p.D326A     | Missense    |  |   |
| NOD3           | NM_178844       | Pa08C | g.chr16:3554351G>A                | c.588G>A   | p.S196S     | Synonymous  |  |   |
| NP_001074311.1 | ENST00000326096 | Pa08C | g.chr6:29339624A>T                | c.212A>T   | p.Y71F      | Missense    |  |   |
| ODZ4           | ENST00000278550 | Pa08C | g.chr11:78058287G>A               | c.6757G>A  | p.V2253M    | Missense    |  |   |
| OR4A16         | NM_001005274    | Pa08C | g.chr11:54867358A>G               | c.106A>G   | p.T36A      | Missense    |  |   |
| OR5J2          | NM_001005492    | Pa08C | g.chr11:55701580C>A               | c.911C>A   | p.A304D     | Missense    |  |   |
| OR8H1          | NM_001005199    | Pa08C | g.chr11:55814357C>A               | c.758C>A   | p.T253N     | Missense    |  |   |
| OVCH1          | NM_183378       | Pa08C | g.chr12:29471803G>T               | c.3373G>T  | p.V1125L    | Missense    |  | Y |
| PALMD          | CCDS758.1       | Pa08C | g.chr1:99866975G>A (homozygous)   | c.1138G>A  | p.E380K     | Missense    |  |   |
| PNPLA1         | NM_001039725    | Pa08C | g.chr6:36383451C>G                | c.1582C>G  | p.P528A     | Missense    |  |   |
| RAD9B          | CCDS9148.1      | Pa08C | g.chr12:109431108C>G              | c.710C>G   | p.P237R     | Missense    |  |   |
| RDH8           | CCDS12223.1     | Pa08C | g.chr19:9985233A>C                | c.60A>C    | p.E20D      | Missense    |  |   |
| SESN2          | CCDS321.1       | Pa08C | g.chr1:28283231C>T (homozygous)   | IVS4-3C>T  | Splice Site | Splice Site |  |   |
| SH3GL3         | CCDS10325.1     | Pa08C | g.chr15:82024888A>C (homozygous)  | IVS2-2A>C  | Splice Site | Splice Site |  |   |
| SLC25A26       | CCDS2905.1      | Pa08C | g.chr3:66503677C>G (homozygous)   | c.404C>G   | p.S135C     | Missense    |  |   |
| SLC2A3         | CCDS8586.1      | Pa08C | g.chr12:7976860C>T                | c.259C>T   | p.R87C      | Missense    |  |   |
| SMAD4          | CCDS11950.1     | Pa08C | g.chr18:46838724delG (homozygous) | c.804delG  | fs          | INDEL       |  | Y |
| SNX16          | CCDS6234.1      | Pa08C | g.chr8:82914771A>C                | c.6A>C     | p.A2A       | Synonymous  |  |   |
| SYNE1          | CCDS5237.1      | Pa08C | g.chr6:152568219T>A               | c.7623T>A  | p.S2541S    | Synonymous  |  |   |
| TBX6           | CCDS10670.1     | Pa08C | g.chr16:30007920C>T               | c.466C>T   | p.R156W     | Missense    |  |   |

|          |                 |       |                                  |            |           |            |  |   |
|----------|-----------------|-------|----------------------------------|------------|-----------|------------|--|---|
| TMEM132B | NM_052907       | Pa08C | g.chr12:124663469A>C             | c.2570A>C  | p.K857T   | Missense   |  |   |
| TP53     | CCDS11118.1     | Pa08C | g.chr17:7518972delT (homozygous) | c.602delT  | fs        | INDEL      |  | Y |
| TTK      | CCDS4993.1      | Pa08C | g.chr6:80804442G>T               | c.2089G>T  | p.D697Y   | Missense   |  |   |
| TTN      | NM_133379       | Pa08C | g.chr2:179435973G>A              | c.16660G>A | p.V5554I  | Missense   |  |   |
| TTN      | NM_133378       | Pa08C | g.chr2:179299693G>A              | c.44146G>A | p.D14716N | Missense   |  |   |
| UBE2M    | CCDS12987.1     | Pa08C | g.chr19:63759348C>T              | c.472C>T   | p.R158W   | Missense   |  |   |
| XKR4     | NM_052898       | Pa08C | g.chr8:56178292C>T               | c.690C>T   | p.G230G   | Synonymous |  |   |
| ZNF253   | ENST00000327867 | Pa08C | g.chr19:23110681C>A              | c.219C>A   | p.P73P    | Synonymous |  |   |

<sup>a</sup> Data from cited reference 5 (Jones et al. Core Signaling Pathways in Human Pancreatic Cancers Revealed by Global Genomic Analyses. Science 2008 321:5897).

<sup>\*</sup> Genomic positions are coordinates in the May 2004, hg17 35.1 UCSC Santa Cruz release of the human genome. Genomic coordinates and sequences of mutations are on the coding strand. All changes are heterozygous unless marked as homozygous. g., genomic sequence; c., cDNA sequence; p., protein sequence; del, deletion; dup, duplication; ins, insertion.

<sup>†</sup> Mutations in intronic sequences are annotated by intron number preceded by "IVS", with positive numbers starting from the G of the GT splice donor site and negative numbers starting from the G of the AG splice acceptor site. Mutations in untranslated regions by "UTR", with positive numbers starting at the first nucleotide after the translation start and negative numbers starting at the first nucleotide before the translation initiation.

<sup>‡</sup> fs, frameshift mutation; UTR, mutation in 5' or 3' untranslated region; indel, in frame insertion, deletion or duplication change affecting more than a single codon. The amino acid change resulting from mutations in the translation initiating methionine are indicated as "unknown".

**Supplementary Table 3.** Allelic Status of Index Lesions based on Illumina 1M SNP Arrays

| Chr      | Pa01                                                                                     | Pa02                                                | Pa03                       | Pa04                                               | Pa05                                                                                                                                    | Pa07                                                       | Pa08                                                                              |
|----------|------------------------------------------------------------------------------------------|-----------------------------------------------------|----------------------------|----------------------------------------------------|-----------------------------------------------------------------------------------------------------------------------------------------|------------------------------------------------------------|-----------------------------------------------------------------------------------|
| <b>1</b> | 2 copies 0-24Mb; LOH 24-27Mb; 2 copies 27-30Mb; >2 copies 30-120Mb; 2 copies 142Mb-246Mb | 2 copies 0-145Mb; LOH 145-147Mb; 2 copies 147-246Mb | >2 copies                  | >2 copies 0Mb-228Mb, >>2 copies 228-247Mb          | >2 copies 0-48Mb; LOH 48-52Mb; >2 copies 52-246Mb                                                                                       | > 2 copies whole chromosome                                | 0Mb-20Mb >2 copies, 20Mb-118Mb LOH, 118Mb-190Mb >2 copies, 190Mb-247Mb >>2 copies |
| <b>2</b> | whole chromosome >2 copies; very small region ~142Mb >3 copies                           | 2 copies 0-12Mb; LOH 12-42Mb; 2 copies 42-242Mb     | >2 copies                  | LOH 0-15Mb, 2 copies 15-90Mb, >2 copies 90Mb-245Mb | LOH 0-35Mb; 2 copies 35-76Mb; LOH 76-78Mb; >2 copies 78-242Mb                                                                           | 2 copies whole chromosome                                  | 2 copies                                                                          |
| <b>3</b> | LOH 0-91Mb; 2 copies 95-162Mb; LOH 162-165Mb; 2 copies 165-200Mb                         | LOH 0-90Mb; >2 copies 90-198Mb                      | whole chromosome LOH       | p arm LOH, q arm >2 copies                         | >2 copies 0-4Mb; LOH 4-7Mb; >2 copies 7-17Mb; LOH 17-69Mb; >2 copies 69-198Mb                                                           | >2 copies 0-168Mb; 2 copies 168-187Mb; >2 copies 187-198Mb | p arm LOH, q arm >2 copies                                                        |
| <b>4</b> | whole chromosome 2 copies                                                                | whole chromosome LOH                                | >2 copies                  | p arm >2 copies, q arm LOH                         | >2 copies 0-173Mb; LOH 173-175Mb; >2copies 175-191Mb                                                                                    | >2 copies whole chromosome                                 | 2 copies                                                                          |
| <b>5</b> | >>2 copies p arm; >2 copies q arm (it looks like p arm might be AAABB and q arm is AAB)  | >2 copies 0-68Mb; LOH 68-70Mb; >2 copies 70-180Mb   | p arm >2 copies, q arm LOH | p arm 2 copies, q arm LOH                          | >2 copies 0-122Mb; 2 copies 122-125Mb; >2 copies 125-128Mb; LOH 128-132Mb; >2 copies 132-151Mb; 2 copies 151-153Mb; >2 copies 153-180Mb | >2 copies 0-172Mb; 2 copies 172-181Mb                      | 2 copies, small region around 55Mb >2 copies                                      |

|          |                                                                                                                        |                                                                                                    |                      |                                                 |                                                                                                                                                                                                                                        |                                                                                                                                      |                                                                        |
|----------|------------------------------------------------------------------------------------------------------------------------|----------------------------------------------------------------------------------------------------|----------------------|-------------------------------------------------|----------------------------------------------------------------------------------------------------------------------------------------------------------------------------------------------------------------------------------------|--------------------------------------------------------------------------------------------------------------------------------------|------------------------------------------------------------------------|
| <b>6</b> | LOH 0-23Mb, >2 copies 24-65Mb; 2 copies 65-149Mb; LOH 149-151Mb; 2 copies 151-152Mb; LOH 152-153Mb; 2 copies 153-171Mb | 2 copies 0-10Mb; >2 copies/complex 10-48Mb; 2 copies 48-57Mb; >2 copies 57-67Mb; 2 copies 67-170Mb | 2 copies             | >2 copies                                       | LOH 0-29Mb; 2 copies 29-52Mb; LOH 52-92Mb; 2 copies 92-93Mb; >2 copies 93-94Mb; LOH 94-99Mb; 2 copies 99-102Mb; LOH 102-105Mb; 2 copies 105-106Mb; LOH 106-108Mb; 2 copies 108-112Mb; LOH 112-138Mb; 2 copies 138-141Mb; LOH 141-171Mb | >2 copies chole chromosome; very small amplified region ~163Mb (likely the whole chromosome is AAB and the amplified region is AABB) | 0Mb-26Mb LOH, 26Mb-27Mb >2 copies, 27Mb-29Mb LOH, 29Mb-171Mb >2 copies |
| <b>7</b> | >2 copies p arm; 2 copies q arm                                                                                        | >2 copies whole chromosome                                                                         | >2 copies            | p arm 2 copies, q arm > 2 copies                | 2 copies 0-7Mb; LOH 7-10Mb; 2 copies 10-149Mb; LOH 149-150Mb; 2 copies 150-158Mb                                                                                                                                                       | > 2 copies whole chromosome                                                                                                          | 2 copies                                                               |
| <b>8</b> | whole chromosome LOH                                                                                                   | LOH 0-33Mb; >2 copies 33-146Mb                                                                     | >2 copies            | LOH 0-128Mb, >2 copies 128-129Mb, LOH 129-146Mb | >2 copies whole chromosome; 88-146Mb appears to be at very high copy (genotype scores approach homozygous, indicative of a AAAAAAB genotype)                                                                                           | >2 copies whole chromosome; >2 copies, but very complex fragmenting 36-146Mb                                                         | p arm LOH, q arm 2 copies                                              |
| <b>9</b> | whole chromosome LOH                                                                                                   | whole chromosome LOH                                                                               | whole chromosome LOH | whole chromosome LOH                            | LOH whole chromosome                                                                                                                                                                                                                   | >2 copies 0-14Mb; LOH 14-19Mb; >2 copies 19-27Mb; LOH 27-                                                                            | whole chromosome LOH, except for small regions of >2 copies at         |

|           |                                                                                     |                                                             |                                                                    |                                                                    |                                                                                             |                                                                                                                                                                   |                                                                                                                  |
|-----------|-------------------------------------------------------------------------------------|-------------------------------------------------------------|--------------------------------------------------------------------|--------------------------------------------------------------------|---------------------------------------------------------------------------------------------|-------------------------------------------------------------------------------------------------------------------------------------------------------------------|------------------------------------------------------------------------------------------------------------------|
|           |                                                                                     |                                                             |                                                                    |                                                                    |                                                                                             | 33Mb; >2 copies 33-140Mb                                                                                                                                          | 35Mb, 37Mb and 136-140Mb                                                                                         |
| <b>10</b> | LOH 0-30Mb; >2 copies 30-135Mb                                                      | >2 copies whole chromosome                                  | whole chromosome LOH                                               | LOH 0-40Mb, >2 copies 40-122Mb, LOH 122-126Mb, >2 copies 126-135Mb | LOH 0-118Mb; 2 copies 118-135Mb                                                             | >2 copies whole chromosome                                                                                                                                        | 2 copies                                                                                                         |
| <b>11</b> | >2 copies whole chromosome                                                          | >2 copies 0-97Mb; 2 copies 97-98Mb; LOH 98-134Mb            | LOH 0-20Mb, >2 copies 20-30Mb, 2 copies 30-135Mb                   | p arm LOH, q arm 2 copies                                          | 2 copies 0-2Mb; >2 copies 2-5Mb; 2 copies 5-127Mb; >2 copies 127-134Mb                      | >2 copies whole chromosome                                                                                                                                        | 0Mb-28Mb LOH, 28Mb-38Mb >2 copies, 38Mb-48Mb LOH, 48Mb-135Mb 2 copies                                            |
| <b>12</b> | >2 copies 0-33Mb; LOH 33-51Mb; >2 copies 51-56Mb; LOH 56-107Mb; >2 copies 107-133Mb | LOH 0-25Mb; >2 copies 25-132mb                              | 2 copies 0-18Mb, >2 copies 18-35Mb, LOH 35-63Mb, 2 copies 63-134Mb | whole chromosome LOH                                               | >2 copies whole chromosome; noisy, but small regions of LOH at ~88Mb, 99Mb, 104Mb and 117Mb | >2 copies whole chromosome; p arm (0-35Mb) is complex and appears to be at very high copy (genotype scores approach homozygous, indicative of a AAAAAAB genotype) | 0Mb-23Mb LOH, 23Mb-32Mb complex >2 copies, 32Mb-36Mb LOH, 36Mb-82Mb 2 copies, 82Mb-86Mb LOH, 86Mb-132Mb 2 copies |
| <b>13</b> | 2 copies 17-62Mb; LOH 62-64Mb; 2 copies 64-94Mb; LOH 94-96Mb; 2 copies 96-114mb     | whole chromosome >2 copies                                  | whole chromosome LOH                                               | 2 copies                                                           | 2 copies 0-79Mb; >2 copies 79-80Mb; 20 copies 80-91Mb; LOH 91-93Mb; 2 copies 93-114Mb       | >2 copies whole chromosome                                                                                                                                        | 17Mb-21Mb LOH, 21Mb-114Mb 2 copies                                                                               |
| <b>14</b> | 2 copies 19-24Mb; >2 copies 24-33Mb; 2 copies 33-78Mb;                              | LOH 18-30Mb; >2 copies 30-35Mb, 2 copies 35-39Mb; >2 copies | >2 copies                                                          | >2 copies                                                          | 2 copies whole chromosome                                                                   | 2 copies whole chromosome                                                                                                                                         | 2 copies                                                                                                         |

|           |                                                                     |                                                                          |                                                 |                                                                         |                                                                                 |                                                                            |                                                               |
|-----------|---------------------------------------------------------------------|--------------------------------------------------------------------------|-------------------------------------------------|-------------------------------------------------------------------------|---------------------------------------------------------------------------------|----------------------------------------------------------------------------|---------------------------------------------------------------|
|           | >2 copies 78-81Mb; 2 copies 81-101Mb; >2 copies 101-107Mb           | 39-50Mb; LOH 50-106mb                                                    |                                                 |                                                                         |                                                                                 |                                                                            |                                                               |
| <b>15</b> | >2 copies 18-26Mb; 2 copies 26-86Mb; >2 copies 86-100Mb             | whole chromosome LOH                                                     | whole chromosome LOH                            | >2 copies 18-24Mb, 2 copies 24-100Mb                                    | 2 copies 18-33Mb, LOH 33-40Mb; 2 copies 40-59Mb; LOH 59-67Mb; 2 copies 67-100Mb | >2 copies whole chromosome                                                 | LOH whole chromosome                                          |
| <b>16</b> | >2 copies whole chromosome; q arm is complex                        | whole chromosome LOH                                                     | >2 copies                                       | >2 copies 0-2Mb, 2 copies 2-3Mb, >2 copies 3-35Mb, 2 copies 35-87Mb     | >2 copies whole chromosome                                                      | >2 copies whole chromosome                                                 | 0Mb-75Mb 2 copies, 75Mb-78Mb complex >2 copies, 78Mb-88Mb LOH |
| <b>17</b> | LOH 0-23Mb; >2 copies 23-78Mb                                       | LOH 0-22Mb; >2 copies 22-53Mb; LOH 53-72Mb; >2 copies 72-78Mb            | LOH 0-19Mb, 2 copies 19-21Mb, >2 copies 21-78Mb | LOH 0-16Mb, >2 copies/complex 16-22Mb, >2 copies 22-77Mb                | LOH 0-14Mb; >2 copies/complex 14-22Mb; >2 copies 22-27Mb; 2 copies 27-79Mb      | LOH 0-22Mb, >2 copies 22-79Mb                                              | 0Mb-30Mb LOH, 30Mb-46Mb 2 copies, 46Mb-78Mb LOH               |
| <b>18</b> | >2 copies 0-17Mb; LOH 17-76Mb; very small region ~31Mb at >2 copies | 2 copies 0-2Mb; LOH 2-3Mb; >2 copies 3-7Mb; 2 copies 7-24Mb; LOH 24-76Mb | whole chromosome LOH                            | p arm >>2 copies, q arm 2 copies                                        | >2 copies/complex 0-21Mb; LOH 21-77Mb                                           | LOH whole chromosome                                                       | LOH whole chromosome                                          |
| <b>19</b> | 2 copies 0-44Mb; >2 copies 44-45Mb; LOH 45-52Mb; >2 copies 52-64Mb  | 2 copies 0-10Mb; >2 copies/complex 10-16Mb; >2 copies 16-64Mb            | LOH p arm, 2 copies q arm                       | >2 copies                                                               | >2 copies whole chromosome                                                      | >2 copies 0-45Mb; 2 copies 45-64Mb                                         | >2 copies                                                     |
| <b>20</b> | 2 copies 0-26mb; >2 copies 26-60Mb                                  | LOH 0-18Mb; >2 copies 18-33Mb; LOH 33-35Mb; >2 copies 35-63Mb            | 2 copies                                        | >2 copies 0-15Mb, 2 copies 15-16Mb, >2 copies 16-27Mb, 2 copies 27-62Mb | LOH 0-21Mb; 2 copies 21-22Mb; LOH 22-27Mb; 2 copies 27-63Mb                     | >2 copies 0-2Mb; LOH 2-13Mb; >2 copies 13-15Mb; LOH 15-18Mb; >2 copies 18- | 0Mb-10Mb LOH, 10Mb-20Mb 2 copies, 20Mb-63Mb complex >2 copies |

|           |                                                                                                                                 |                                                 |                                      |                                                                                                                  |                                      |                                      |                                      |
|-----------|---------------------------------------------------------------------------------------------------------------------------------|-------------------------------------------------|--------------------------------------|------------------------------------------------------------------------------------------------------------------|--------------------------------------|--------------------------------------|--------------------------------------|
|           |                                                                                                                                 |                                                 |                                      |                                                                                                                  |                                      | 22Mb; LOH 22-26Mb; >2 copies 26-63Mb |                                      |
| <b>21</b> | >2 copies 0-16Mb; 2 copies 16-23Mb; >2 copies 23-24Mb; 2 copies 24-28Mb; >2 copies 28-37Mb; 2 copies 37-40Mb; >2 copies 40-47Mb | 2 copies 13-23Mb; LOH 23-25Mb; 2 copies 25-47Mb | whole chromosome LOH                 | >2 copies 10-15Mb, 2 copies 15-47Mb                                                                              | LOH whole chromosome                 | >2 copies whole chromosome           | >2 copies                            |
| <b>22</b> | > 2 copies whole chromosome                                                                                                     | LOH whole chromosome                            | >2 copies                            | LOH 14-15Mb, 2 copies 15-16Mb, LOH 16-18Mb, >2 copies/complex 18-28Mb, LOH 28-39Mb, complex 39-41Mb, LOH 41-48Mb | 2 copies whole chromosome            | >2 copies whole chromosome           | whole chromosome LOH                 |
| <b>X</b>  | LOH whole chromosome/patient is male                                                                                            | LOH whole chromosome/patient is male            | LOH whole chromosome/patient is male | 2 copies 0-2Mb, LOH 2-88Mb, 2 copies 88-93Mb, LOH 93-154Mb                                                       | LOH whole chromosome/patient is male | LOH whole chromosome/patient is male | LOH whole chromosome/patient is male |



**Supplementary Table 4.** Ki67 labeling indices in normal and neoplastic pancreatic tissues.

| Patient no. | Organ           | Ki-67 IHC (raw data) |                 |              | Ki-67 labeling index (%) |
|-------------|-----------------|----------------------|-----------------|--------------|--------------------------|
|             |                 | Positive nuclei      | Negative nuclei | Total nuclei |                          |
| Pa01        | liver mets      | 247                  | 2457            | 2704         | 10.05                    |
| Pa02        | liver mets      | 442                  | 2497            | 2939         | 15.04                    |
| Pa03        | liver mets      | 450                  | 1967            | 2417         | 18.62                    |
| Pa04        | lung mets       | 601                  | 2596            | 3197         | 18.8                     |
| Pa05        | peritoneal mets | 1352                 | 2484            | 3836         | 35.25                    |
| Pa07        | peritoneal mets | 119                  | 2804            | 2923         | 4.07                     |
| Pa08        | lung mets       | 484                  | 3311            | 3795         | 12.75                    |
|             | <b>TOTALS</b>   | 3695                 | 18116           | 21811        |                          |
|             | <b>AVERAGE</b>  | 527.8571429          | 2588            | 3115.857143  | 16.36857143              |
|             |                 |                      |                 |              |                          |
| N1          | normal pancreas | 2                    | 1866            | 1868         | 0.11                     |
| N2          | normal pancreas | 9                    | 1312            | 1321         | 0.68                     |
| N3          | normal pancreas | 5                    | 881             | 886          | 0.56                     |
| N4          | normal pancreas | 3                    | 960             | 963          | 0.31                     |
| N5          | normal pancreas | 16                   | 2108            | 2124         | 0.75                     |
| N6          | normal pancreas | 5                    | 1485            | 1490         | 0.34                     |
| N7          | normal pancreas | 1                    | 919             | 920          | 0.11                     |
|             | <b>TOTALS</b>   | 41                   | 9531            | 9572         |                          |
|             | <b>AVERAGE</b>  | 5.857142857          | 1361.571429     | 1367.428571  | 0.41                     |

**Supplementary Table 5:** Estimates of Time in the Clonal Evolution of Metastatic Pancreatic Cancer.

| <b>Patient</b>        | $T_1$             | $T_2$            | $T_3$            | <b>Total tumor time</b> | <b>Patient age at tumor initiation</b> |
|-----------------------|-------------------|------------------|------------------|-------------------------|----------------------------------------|
| Pa01C                 | 16.1 ± 2.5        | 9.8 ± 2.0        | 2.9 ± 1.2        | 28.8 ± 3.4              | 33.7 ± 3.4                             |
| Pa02C                 | 10.6 ± 2.0        | 9.4 ± 1.9        | 2.7 ± 1.2        | 22.7 ± 3.0              | 34.8 ± 3.0                             |
| Pa03C                 | 7.9 ± 1.8         | 2.4 ± 1.0        | 2.7 ± 1.2        | 13.0 ± 2.4              | 47.5 ± 2.4                             |
| Pa04C                 | 11.4 ± 2.1        | 7.9 ± 1.8        | 2.7 ± 1.2        | 22.0 ± 3.0              | 37.5 ± 3.0                             |
| Pa05X                 | 9.1 ± 1.9         | 4.3 ± 1.30       | 2.3 ± 1.2        | 15.7 ± 2.6              | 34.8 ± 2.6                             |
| Pa07C                 | 15.7 ± 2.5        | 3.1 ± 1.1        | 2.7 ± 1.2        | 21.5 ± 3.0              | 60.0 ± 3.0                             |
| Pa08C                 | 11.4 ± 2.1        | 10.6 ± 2.0       | 2.7 ± 1.2        | 24.7 ± 3.1              | 26.8 ± 3.1                             |
| <b><u>Average</u></b> | <b>11.7 ± 3.1</b> | <b>6.8 ± 3.4</b> | <b>2.7 ± 1.2</b> | <b>21.2 ± 4.8</b>       | <b>39.3 ± 4.8</b>                      |

**Supplementary Table 6:** Estimates of Number of Cell Divisions in Different Stages of Clonal Evolution of Metastatic Pancreatic Cancer

| <b>Patient</b> | <b><i>Number of divisions during <math>T_1</math></i></b> | <b><i>Number of divisions during <math>T_2</math></i></b> |
|----------------|-----------------------------------------------------------|-----------------------------------------------------------|
| Pa01C          | 2557 $\pm$ 397                                            | 1556 $\pm$ 318                                            |
| Pa02C          | 1683 $\pm$ 318                                            | 1493 $\pm$ 302                                            |
| Pa03C          | 1255 $\pm$ 285                                            | 381 $\pm$ 159                                             |
| Pa04C          | 1810 $\pm$ 333                                            | 1255 $\pm$ 286                                            |
| Pa05X          | 1445 $\pm$ 302                                            | 683 $\pm$ 206                                             |
| Pa07C          | 2493 $\pm$ 397                                            | 492 $\pm$ 175                                             |
| Pa08C          | 1810 $\pm$ 333                                            | 1683 $\pm$ 318                                            |
